# Supplementary material for: The hemicellulose-degrading enzyme system of the thermophilic bacterium Clostridium stercorarium: comparative characterisation and addition of new hemicellulolytic glycoside hydrolases
Source: Biotechnol Biofuels. 2018 Aug 23;11:229. doi: 10.1186/s13068-018-1228-3 (PMC6106730; doi:10.1186/s13068-018-1228-3)
Supplement: Supplementary file 2 — Additional file 2. This file contains the complete processed data set of the LC-MS/MS proteome analysis: LC–MS/MS data of the secretome (SU) and the intracellular proteome (PE) of C. stercorarium. [file 13068_2018_1228_MOESM2_ESM.xlsx]

## Sheet: paper informations
The hemicellulose-degrading enzyme system of the thermophilic bacterium Clostridium stercorarium – comparative characterisation and addition of new hemicellulolytic glycoside hydrolases
- Additional file 2 -
Broeker1, Jannis (jannis.broeker@tum.de), Mechelke1, Matthias (matthias.mechelke@tum.de), Baudrexl1, Melanie (melanie.baudrexl@tum.de), Mennerich, Denise (denise.mennerich@tum.de ), Hornburg2,3, Daniel (hornburg@stanford.edu), Mann3, Matthias (mmann@biochem.mpg.de), Schwarz1, Wolfgang H. (wolfgang.schwarz@tum.de), Liebl1, Wolfgang (wliebl@wzw.tum.de), Zverlov1,4*, Vladimir V. (vladimir.zverlov@tu…
1 Department of Microbiology, TUM School of Life Sciences Weihenstephan, Technical University of Munich, Emil-Ramann-Str. 4, 85354 Freising, Germany
2 Present addres: School of Medicine, Stanford University, 94305 Stanford, CA, USA
3 Max Planck Institute of Biochemistry, Am Klopferspitz 18, 82152 Martinsried, Germany
4 Institute of Molecular Genetics, Russian Academy of Science, Kurchatov Sq. 2, 123182 Moscow, Russia
* Corresponding author: Dr. Vladimir V. Zverlov. email: vladimir.zverlov@tum.de, Tel.: +49-8161-715474

## Sheet: LC-MSMS data
LC-MS/MS data of the secretome (SU) and the intracellular proteome (PE) of C. stercorarium.
C. stercorarium was grown in GS2 medium with 0.5% w/v cellobiose for 24 h. Protein IDs, protein number, sequence coverage, and the protein length normalised log2 protein intensities (iBAQ) of the proteins detected in the secretome (SU) and intracellular proteome (PE) are given.
secretome				intracellular proteome
protein IDs	protein number	sequence coverage (%)	iBAQ SU	protein IDs	protein number	sequence coverage (%)	iBAQ PE
Cst_c00010	1	20.2	4.16408	Cst_c00010	1	62.5	11.2878
Cst_c00030	1	50.7	9.03388	Cst_c00030	1	65	12.2592
Cst_c00060	1	10	4.04516	Cst_c00040	1	8.6	3.02908
Cst_c00110	1	64.3	11.3411	Cst_c00050	1	36.5	9.77989
Cst_c00140	1	39.5	8.13944	Cst_c00060	1	44.5	10.6931
Cst_c00170	1	42	8.09543	Cst_c00080	1	52.5	9.22151
Cst_c00190	1	50.7	7.54842	Cst_c00090	1	61	11.4747
Cst_c00200	1	50.4	7.6313	Cst_c00100	1	15.4	11.2106
Cst_c00210	1	51.9	10.052	Cst_c00110	1	79.6	14.557
Cst_c00260	1	54.9	11.2539	Cst_c00140	1	47.5	10.9975
Cst_c00380	1	20.2	5.07143	Cst_c00150	1	16.7	6.79354
Cst_c00390	1	64.5	9.30919	Cst_c00170	1	54.2	10.4857
Cst_c00400	1	4.9	1.79504	Cst_c00190	1	56.3	10.8884
Cst_c00410	1	57.2	9.1783	Cst_c00200	1	54.1	10.535
Cst_c00440	1	10.1	2.79102	Cst_c00210	1	56.5	11.9466
Cst_c00470	1	40.1	9.65405	Cst_c00220	1	31.9	9.31043
Cst_c00530	1	67.3	9.9978	Cst_c00260	1	29	8.66674
Cst_c00650	1	34.1	6.97862	Cst_c00270	1	48.4	11.9069
Cst_c00680	1	17.1	4.75025	Cst_c00280	1	11.6	5.50294
Cst_c00690	1	8.1	3.45611	Cst_c00310	1	6.8	5.93981
Cst_c00710	1	23.7	5.43485	Cst_c00340	1	23.3	7.63262
Cst_c00730	1	33.7	9.57459	Cst_c00380	1	16.7	4.2327
Cst_c00740	1	34.5	4.21739	Cst_c00390	1	64.5	11.9752
Cst_c00840	1	22.8	9.9048	Cst_c00400	1	19.8	6.08518
Cst_c00870	1	45.7	13.0031	Cst_c00410	1	67.9	10.9219
Cst_c00880	1	61.7	14.2586	Cst_c00420	1	7.9	5.61043
Cst_c00900	1	9.2	2.15233	Cst_c00430	1	41.6	8.81354
Cst_c00970	1	45.1	6.56511	Cst_c00440	1	29	8.64627
Cst_c01050	1	70.3	13.1393	Cst_c00450	1	60.5	11.1924
Cst_c01120	1	39.4	8.91184	Cst_c00460	1	15	6.13529
Cst_c01130	1	18.3	6.18528	Cst_c00470	1	62.1	14.6755
Cst_c01210	1	48	9.09732	Cst_c00490	1	6.3	5.0789
Cst_c01220	1	25	8.51099	Cst_c00500	1	31.5	6.79535
Cst_c01240	1	19.1	4.44992	Cst_c00510	1	48.2	9.99912
Cst_c01260	1	26.3	9.78975	Cst_c00530	1	53.9	9.72624
Cst_c01270	1	55.3	12.2997	Cst_c00570	1	7.8	5.8616
Cst_c01340	1	71.3	13.7249	Cst_c00580	1	15	6.74496
Cst_c01370	1	11.9	4.81787	Cst_c00590	1	11.1	5.70677
Cst_c01380	1	9.6	5.68185	Cst_c00610	1	7.9	4.71144
Cst_c01550	1	49	10.1324	Cst_c00650	1	28.3	8.6072
Cst_c01560	1	24.9	4.5903	Cst_c00660	1	45.9	8.84437
Cst_c01590	1	68	13.1692	Cst_c00680	1	49.9	10.0508
Cst_c01600	1	16.6	6.35008	Cst_c00690	1	19.9	6.49406
Cst_c01660	1	49.3	8.17003	Cst_c00710	1	47.4	11.6204
Cst_c01690	1	36.1	5.10704	Cst_c00730	1	37.1	11.3264
Cst_c01730	1	75.8	13.4879	Cst_c00740	1	26.9	10.0986
Cst_c01740	1	61.5	3.85706	Cst_c00760	1	17.3	5.49291
Cst_c01750	1	62.6	15.4147	Cst_c00790	1	36.3	10.0155
Cst_c01780	1	35.8	10.176	Cst_c00820	1	31.3	7.34823
Cst_c01810	1	38.8	5.46598	Cst_c00840	1	24.7	9.75806
Cst_c01890	1	25.8	6.41163	Cst_c00850	1	25.3	10.5033
Cst_c01930	1	64.5	11.5164	Cst_c00860	1	63.2	13.9202
Cst_c02010	1	52.3	10.0619	Cst_c00870	1	4.3	5.80306
Cst_c02050	1	73.8	14.1508	Cst_c00880	1	18.8	6.44458
Cst_c02130	1	26.8	6.86984	Cst_c00900	1	5.3	2.77063
Cst_c02160	1	26.1	4.73347	Cst_c00910	1	53.7	9.06045
Cst_c02170	1	32.1	7.48724	Cst_c00960	1	3.2	3.41667
Cst_c02200	1	7.9	2.83115	Cst_c00970	1	38.8	8.42686
Cst_c02230	1	12.5	2.71908	Cst_c00980	1	6.6	4.4505
Cst_c02280	1	55.7	9.91991	Cst_c00990	1	37.4	6.59945
Cst_c02300	1	17.8	4.92033	Cst_c01000	1	3.8	4.61148
Cst_c02350	1	41.3	6.96125	Cst_c01050	1	75.1	11.3633
Cst_c02380	1	70.1	9.81653	Cst_c01070	1	16.4	8.01501
Cst_c02430	1	63.4	10.1683	Cst_c01080	1	11.2	5.79775
Cst_c02440	1	13.1	3.21543	Cst_c01110	1	17.2	5.53395
Cst_c02460	1	15.3	6.91247	Cst_c01120	1	61	11.98
Cst_c02510	1	29.2	7.12444	Cst_c01130	1	56.1	10.5107
Cst_c02550	1	20.7	4.96916	Cst_c01200	1	27.4	3.09237
Cst_c02640	1	52.1	8.97303	Cst_c01210	1	37.7	8.78234
Cst_c02650	1	63	10.3985	Cst_c01220	1	38.1	11.3555
Cst_c02680	1	1.8	0.860537	Cst_c01240	1	34.2	8.39141
Cst_c02710	1	80.6	10.0394	Cst_c01250	1	84.8	12.8412
Cst_c02750	1	6.3	1.70913	Cst_c01260	1	68.7	14.6185
Cst_c02760	1	55.5	9.77849	Cst_c01270	1	57.3	13.7911
Cst_c02770	1	85	13.6517	Cst_c01290	1	8.1	8.01584
Cst_c02800	1	8.1	2.85472	Cst_c01300	1	58.6	9.52205
Cst_c02810	1	19.8	4.06306	Cst_c01310	1	45.2	10.2278
Cst_c02820	1	12.5	3.87523	Cst_c01320	1	18.3	5.53241
Cst_c02830	1	41.5	7.07909	Cst_c01330	1	7.7	4.44934
Cst_c02860	1	19	5.06628	Cst_c01340	1	90.4	17.1288
Cst_c02880	1	39.9	10.8782	Cst_c01350	1	11.7	4.20964
Cst_c02910	1	52.2	5.0267	Cst_c01370	1	66.4	14.2387
Cst_c02940	1	75	12.725	Cst_c01380	1	24.8	10.645
Cst_c02960	1	31.4	6.93572	Cst_c01450	1	56.7	11.3521
Cst_c02970	1	22.8	4.1297	Cst_c01460	1	2.5	6.00509
Cst_c02980	1	20.4	6.73824	Cst_c01470	1	11.7	6.43927
Cst_c03050	1	80.1	11.6184	Cst_c01500	1	52.9	11.7289
Cst_c03090	1	31	4.40149	Cst_c01520	1	32.6	11.3961
Cst_c03130	1	69.9	11.158	Cst_c01530	1	34.6	9.06042
Cst_c03150	1	4.7	3.27025	Cst_c01540	1	69	12.1935
Cst_c03170	1	8.7	4.673	Cst_c01550	1	50.2	12.7842
Cst_c03190	1	10	4.50569	Cst_c01560	1	30.3	11.0676
Cst_c03200	1	7.3	1.95877	Cst_c01590	1	68	13.8809
Cst_c03240	1	39.9	7.54317	Cst_c01600	1	38.8	7.47266
Cst_c03250	1	46.6	8.8924	Cst_c01660	1	69.5	11.4707
Cst_c03260	1	11.9	3.437	Cst_c01670	1	18	8.24283
Cst_c03280	1	44.6	6.92047	Cst_c01680	1	10.5	6.65462
Cst_c03300	1	28.8	6.448	Cst_c01690	1	67.3	10.8937
Cst_c03310	1	66.3	5.01664	Cst_c01700	1	17.3	7.31677
Cst_c03320	1	53.4	9.39349	Cst_c01710	1	8.9	8.23906
Cst_c03340	1	83.4	15.0887	Cst_c01730	1	54.1	10.1734
Cst_c03350	1	6.3	3.98706	Cst_c01740	1	52.9	12.0627
Cst_c03360	1	44.7	10.5036	Cst_c01750	1	4.5	3.99639
Cst_c03380	1	24.6	5.48177	Cst_c01810	1	63.1	11.3273
Cst_c03480	1	22.5	5.32904	Cst_c01820	1	58.7	11.4219
Cst_c03490	1	27.2	5.97444	Cst_c01830	1	45.9	10.4655
Cst_c03520	1	68.3	10.2436	Cst_c01840	1	36.3	7.94116
Cst_c03540	1	18.5	5.7023	Cst_c01880	1	15.7	6.25263
Cst_c03620	1	50.8	9.13997	Cst_c01890	1	60.4	10.0307
Cst_c03630	1	54.5	10.9814	Cst_c01920	1	88.9	12.3187
Cst_c03650	1	13.8	4.32897	Cst_c01930	1	41.3	10.5933
Cst_c03660	1	11.1	8.0488	Cst_c02010	1	71	10.4443
Cst_c03690	1	13	5.34875	Cst_c02050	1	93.6	16.1311
Cst_c03700	1	73.9	13.5885	Cst_c02060	1	21.5	9.98438
Cst_c03710	1	66.6	13.2614	Cst_c02070	1	36.1	9.5258
Cst_c03720	1	38.3	5.98342	Cst_c02090	1	36.9	7.50079
Cst_c03780	1	24.8	6.94773	Cst_c02100	1	14.7	5.24397
Cst_c03790	1	62.6	12.4664	Cst_c02130	1	13.3	5.66147
Cst_c03920	1	6.3	4.27694	Cst_c02160	1	38.9	8.47981
Cst_c03980	1	9.1	4.62732	Cst_c02170	1	48.6	10.5961
Cst_c04060	1	18.2	5.23819	Cst_c02180	1	20.5	5.55435
Cst_c04100	1	67.7	13.0353	Cst_c02190	1	10.1	6.09536
Cst_c04110	1	66.8	14.5085	Cst_c02200	1	47.7	8.87571
Cst_c04120	1	9.9	4.52035	Cst_c02230	1	20.6	6.44688
Cst_c04150	1	17.9	5.35067	Cst_c02250	1	19.9	6.74558
Cst_c04160	1	46.8	8.43992	Cst_c02280	1	42	10.7243
Cst_c04170	1	7	5.37874	Cst_c02300	1	26.8	7.60484
Cst_c04190	1	41.4	8.6281	Cst_c02320	1	31.2	7.0606
Cst_c04200	1	6.8	7.88465	Cst_c02350	1	62.4	9.25591
Cst_c04210	1	22	5.78894	Cst_c02370	1	12.8	7.45824
Cst_c04220	1	20.4	5.18138	Cst_c02380	1	72.4	14.3767
Cst_c04230	1	19.2	5.66192	Cst_c02400	1	27.5	7.56151
Cst_c04240	1	22.9	6.33683	Cst_c02430	1	37	9.96505
Cst_c04250	1	32.5	9.48527	Cst_c02440	1	15.8	6.3654
Cst_c04260	1	34.3	7.5822	Cst_c02450	1	4.1	4.06344
Cst_c04270	1	61.1	11.3544	Cst_c02460	1	65.2	12.0067
Cst_c04280	1	57.8	10.4449	Cst_c02470	1	19.3	8.68796
Cst_c04310 Cst_c07520	2	69.8	9.32795	Cst_c02510	1	31.9	8.48172
Cst_c04430	1	47.8	10.138	Cst_c02520	1	8.8	5.58657
Cst_c04480	1	2.5	1.49362	Cst_c02530	1	27.1	8.04979
Cst_c04560	1	56.8	9.50564	Cst_c02540	1	15	5.58105
Cst_c04580	1	7	4.94757	Cst_c02550	1	65.5	10.278
Cst_c04590	1	31.6	6.74453	Cst_c02560	1	32.4	8.15485
Cst_c04610	1	76.5	10.7597	Cst_c02570	1	49.1	10.9974
Cst_c04620	1	25.2	9.47252	Cst_c02580	1	32.9	8.13546
Cst_c04650	1	32.4	4.96082	Cst_c02590	1	21.9	7.38846
Cst_c04690	1	63.4	8.86436	Cst_c02640	1	58.4	12.2569
Cst_c04710	1	64.2	14.4384	Cst_c02650	1	59.5	12.4082
Cst_c04720	1	34.7	7.12582	Cst_c02660	1	62.7	11.5718
Cst_c04730	1	45.3	9.96999	Cst_c02680	1	6.1	3.55006
Cst_c04770	1	31.6	2.60124	Cst_c02700	1	35	9.30536
Cst_c04870	1	64.5	6.36724	Cst_c02710	1	81.4	12.3238
Cst_c04890	1	28.9	7.58338	Cst_c02720	1	25.9	8.89341
Cst_c04930	1	35.1	5.48472	Cst_c02740	1	22.1	8.58391
Cst_c04990	1	17.5	6.57263	Cst_c02750	1	28.3	6.04913
Cst_c05000	1	34.3	7.02902	Cst_c02760	1	61.6	14.0989
Cst_c05020	1	60.2	13.3579	Cst_c02770	1	86	15.0872
Cst_c05030	1	13	3.95652	Cst_c02780	1	44.7	9.51924
Cst_c05040	1	45.3	10.2377	Cst_c02790	1	76.5	10.75
Cst_c05070	1	85.7	15.055	Cst_c02800	1	37.3	11.6774
Cst_c05090	1	63.8	9.75703	Cst_c02810	1	82.6	12.8645
Cst_c05100	1	8.3	3.54485	Cst_c02820	1	55.6	14.6125
Cst_c05110	1	17.5	6.64279	Cst_c02830	1	79.2	15.7248
Cst_c05140	1	46	8.71908	Cst_c02860	1	37.8	7.88427
Cst_c05150	1	8.7	2.22919	Cst_c02870	1	36.4	9.0432
Cst_c05160	1	33	7.04748	Cst_c02880	1	39.9	11.5633
Cst_c05180	1	53.3	7.0494	Cst_c02910	1	71.1	10.8109
Cst_c05230	1	13.3	6.78318	Cst_c02930	1	33	8.20913
Cst_c05240	1	27.7	8.1899	Cst_c02940	1	77.2	13.49
Cst_c05260	1	69.8	10.2587	Cst_c02950	1	41	9.47828
Cst_c05270	1	44.7	9.01337	Cst_c02960	1	31.4	10.3614
Cst_c05290	1	44.5	8.19884	Cst_c02970 Cst_c15860	2	72.4	13.603
Cst_c05300	1	62.7	13.5454	Cst_c02980	1	81.7	13.507
Cst_c05380	1	27.5	10.1567	Cst_c03010	1	37.8	8.78364
Cst_c05390	1	28.1	6.20054	Cst_c03020	1	26.2	8.51286
Cst_c05400	1	9.2	4.39899	Cst_c03030	1	9.6	9.26262
Cst_c05410	1	66.5	14.5246	Cst_c03040	1	39.1	8.58269
Cst_c05420	1	49.1	8.49897	Cst_c03050	1	83.7	13.7395
Cst_c05440	1	55.8	9.16468	Cst_c03060	1	10.9	5.09491
Cst_c05450	1	61.9	9.72969	Cst_c03080	1	12.5	4.84291
Cst_c05500	1	2.9	4.23566	Cst_c03090	1	85.3	13.1398
Cst_c05510	1	37.7	6.77015	Cst_c03100	1	35.2	7.55106
Cst_c05670	1	29.3	1.81094	Cst_c03110	1	27.2	9.23414
Cst_c05680	1	64.5	13.5331	Cst_c03130	1	74.8	12.6664
Cst_c05690	1	77.7	14.5877	Cst_c03140	1	6.4	3.94743
Cst_c05710	1	89.3	15.4118	Cst_c03150	1	50	11.2215
Cst_c05750	1	18.1	4.76428	Cst_c03160	1	71.3	11.2481
Cst_c05840	1	67.8	2.06859	Cst_c03170	1	44.8	11.2819
Cst_c05880	1	52.9	10.4913	Cst_c03180	1	48.5	10.5142
Cst_c05890	1	3.7	3.45029	Cst_c03190	1	66.7	12.0856
Cst_c05900	1	18.1	7.02677	Cst_c03200	1	69.9	11.7941
Cst_c05910	1	23.9	5.8624	Cst_c03210	1	43.6	10.4775
Cst_c05940	1	7.1	4.75862	Cst_c03220	1	50	9.80653
Cst_c06020	1	57.3	9.79941	Cst_c03230	1	50.6	9.98505
Cst_c06040	1	59.8	10.456	Cst_c03240	1	42.9	9.41348
Cst_c06060	1	47.6	7.38521	Cst_c03250	1	39.8	9.8671
Cst_c06140	1	46	8.0592	Cst_c03260	1	47.1	8.96869
Cst_c06160	1	4.8	7.19032	Cst_c03280	1	83.7	12.7215
Cst_c06190	1	21.7	6.6621	Cst_c03290	1	13.2	8.19926
Cst_c06220	1	27.2	10.2884	Cst_c03300	1	46.5	10.3841
Cst_c06260	1	44.1	8.42801	Cst_c03310	1	76	13.7685
Cst_c06270	1	51.5	11.6166	Cst_c03320	1	58.7	9.34752
Cst_c06280	1	14.6	5.784	Cst_c03340	1	28.5	8.28866
Cst_c06310	1	25.1	8.54057	Cst_c03350	1	38	9.70087
Cst_c06320	1	69.8	10.2442	Cst_c03360	1	54	12.8993
Cst_c06350	1	60.8	10.1614	Cst_c03370	1	49.5	12.5602
Cst_c06430	1	13.7	2.47105	Cst_c03380	1	24.6	9.60319
Cst_c06490	1	19	2.1832	Cst_c03410	1	14.6	9.42356
Cst_c06530	1	42.6	7.97738	Cst_c03420	1	39.3	11.1331
Cst_c06550	1	52	10.1357	Cst_c03430	1	22.5	9.67983
Cst_c06590	1	65.2	11.2469	Cst_c03440	1	19.9	12.1507
Cst_c06620	1	62.7	11.3836	Cst_c03450	1	36.7	11.4513
Cst_c06630	1	19.5	6.99717	Cst_c03460	1	72.8	11.5507
Cst_c06640	1	69.5	11.4722	Cst_c03470	1	67.6	10.2085
Cst_c06670	1	67.8	11.6018	Cst_c03480	1	71.4	12.092
Cst_c06690	1	50	7.63269	Cst_c03490	1	73.4	12.0262
Cst_c06700	1	16.5	5.87996	Cst_c03500	1	56	10.8356
Cst_c06710	1	47.6	5.25213	Cst_c03520	1	84.3	12.5066
Cst_c06730	1	74.8	13.7836	Cst_c03530	1	28.9	6.84355
Cst_c06770	1	72.6	13.2883	Cst_c03590	1	60	12.631
Cst_c06780	1	29.2	4.75122	Cst_c03600	1	75.4	10.8684
Cst_c06790	1	40.2	8.14289	Cst_c03620	1	14.4	6.32021
Cst_c06870	1	42	8.19106	Cst_c03630	1	68	12.1017
Cst_c06880	1	37.1	11.2814	Cst_c03650	1	26.4	5.40799
Cst_c06930	1	72.9	12.8926	Cst_c03660	1	30.7	13.319
Cst_c07090	1	45.5	9.07258	Cst_c03670	1	16.4	6.66975
Cst_c07130	1	20	5.26035	Cst_c03680	1	14.6	5.33287
Cst_c07180	1	30.1	5.43708	Cst_c03700	1	26.3	7.46744
Cst_c07190	1	13.5	4.67586	Cst_c03710	1	29.6	7.56935
Cst_c07200	1	11.6	5.82382	Cst_c03720	1	49	8.97044
Cst_c07210	1	28.9	6.37117	Cst_c03730	1	9.5	6.57865
Cst_c07250	1	35.5	7.20291	Cst_c03740	1	60.1	11.0886
Cst_c07290	1	25.9	4.38978	Cst_c03750	1	24	8.03093
Cst_c07340	1	4.3	3.33774	Cst_c03760	1	23.4	7.84757
Cst_c07430	1	6.6	3.56872	Cst_c03780	1	52.6	10.9186
Cst_c07540	1	82.1	11.6163	Cst_c03790	1	76.2	13.8301
Cst_c07550	1	31.6	10.6346	Cst_c03830 Cst_c04040 Cst_c08200 Cst_c12070 Cst_c12200 Cst_c12550 Cst_c14540 Cst_c17070 Cst_c19510 Cst_c23350 Cst_c18210 Cst_c18110 Cst_c18100 Cst_c18090	14	32.1	8.4876
Cst_c07570	1	65.8	14.569	Cst_c03850	1	13.8	5.06941
Cst_c07590	1	8.7	4.46072	Cst_c03870	1	69.9	10.1035
Cst_c07640	1	7.8	5.93655	Cst_c03880	1	15.2	7.57256
Cst_c07680	1	61.9	11.5047	Cst_c03910	1	16.2	5.24181
Cst_c07690	1	63.9	9.11824	Cst_c03920	1	8.5	6.89523
Cst_c07700	1	20.9	7.14703	Cst_c04100	1	40.1	7.42217
Cst_c07710	1	20.8	2.49771	Cst_c04110	1	45.9	10.1445
Cst_c07730	1	60.3	12.1909	Cst_c04180	1	86.8	11.4793
Cst_c07740	1	35.1	8.63584	Cst_c04190	1	9	5.45472
Cst_c07820	1	46.7	7.91	Cst_c04330	1	30.4	7.91778
Cst_c07850	1	70	6.29615	Cst_c04360	1	38.1	7.93712
Cst_c07880	1	44.7	5.87291	Cst_c04380 Cst_c04520	2	30.1	6.39858
Cst_c07920	1	53.9	8.79735	Cst_c04410	1	11.1	6.40611
Cst_c07940	1	2.7	3.14875	Cst_c04430	1	61.9	12.9087
Cst_c07960	1	14.3	6.51899	Cst_c04460	1	41.5	7.24705
Cst_c08000	1	23	7.52127	Cst_c04470	1	14.4	6.7495
Cst_c08010	1	8.2	3.45346	Cst_c04480	1	20.2	6.01643
Cst_c08120	1	70.2	10.5399	Cst_c04560	1	64.7	11.948
Cst_c08140	1	18.5	6.21826	Cst_c04570	1	36.3	6.86574
Cst_c08160	1	37.8	8.47429	Cst_c04590	1	7.6	4.74542
Cst_c08180	1	62.6	9.33674	Cst_c04610	1	73.5	12.7131
Cst_c08190	1	71	10.845	Cst_c04620	1	30.4	8.23578
Cst_c08260	1	4.2	3.8582	Cst_c04630	1	19	7.08
Cst_c08300	1	56.7	5.45953	Cst_c04640	1	7.2	5.92903
Cst_c08310	1	65.5	9.88253	Cst_c04650	1	68.2	11.7503
Cst_c08340	1	51.1	8.77895	Cst_c04660	1	31.2	10.5651
Cst_c08400	1	32.7	4.58266	Cst_c04690	1	45.5	8.85942
Cst_c08420	1	84.2	14.7512	Cst_c04710	1	59.7	13.7144
Cst_c08430	1	3	1.9741	Cst_c04720	1	48.3	9.4283
Cst_c08470	1	65.9	12.0263	Cst_c04730	1	63.3	11.779
Cst_c08480	1	32.5	6.98304	Cst_c04770	1	65.3	10.5965
Cst_c08510	1	54.7	9.14332	Cst_c04780	1	22.7	7.19186
Cst_c08530	1	63.2	9.26075	Cst_c04790	1	31.6	7.57555
Cst_c08550	1	41.3	9.61912	Cst_c04800	1	23	6.04874
Cst_c08570	1	27.1	8.51244	Cst_c04830	1	37.4	9.21409
Cst_c08600	1	22.3	7.04355	Cst_c04850	1	26.1	7.50811
Cst_c08620	1	28.5	6.54948	Cst_c04870	1	83.9	12.3804
Cst_c08640	1	18	4.8596	Cst_c04890	1	72	12.5463
Cst_c08650	1	6.3	3.69729	Cst_c04900	1	10.6	8.78463
Cst_c08660	1	30.6	7.59353	Cst_c04910	1	46.3	11.6256
Cst_c08680	1	41.9	8.34275	Cst_c04930	1	40.8	8.97794
Cst_c08720	1	81.6	14.7364	Cst_c04990	1	46.7	10.2476
Cst_c08730	1	5.4	6.91807	Cst_c05000	1	33.9	9.55903
Cst_c08750	1	45.6	6.63124	Cst_c05010	1	36.9	7.0982
Cst_c08790	1	81.5	9.48542	Cst_c05020	1	19.8	7.33114
Cst_c08810	1	60.1	12.3073	Cst_c05030	1	21.2	7.65168
Cst_c08820	1	66.4	9.94774	Cst_c05040	1	39.5	11.2
Cst_c08850	1	70.7	11.3253	Cst_c05060	1	8.3	6.23046
Cst_c08860	1	45	9.34094	Cst_c05070	1	72.8	12.4831
Cst_c08880	1	39	8.97035	Cst_c05090	1	73.2	14.5537
Cst_c08910	1	49.8	8.7654	Cst_c05100	1	55.1	11.0784
Cst_c08940	1	33.9	8.24619	Cst_c05110	1	31.1	8.94044
Cst_c09110	1	49.6	9.28539	Cst_c05130	1	37.1	7.92513
Cst_c09130	1	55.8	11.3333	Cst_c05140	1	78.1	14.1686
Cst_c09150	1	76	11.6331	Cst_c05150	1	23.5	7.98399
Cst_c09160	1	57.8	6.63832	Cst_c05160	1	54.7	16.0048
Cst_c09180	1	28.7	4.99333	Cst_c05170	1	28.4	8.26617
Cst_c09230	1	52.8	9.19906	Cst_c05180	1	60.9	14.8656
Cst_c09260	1	37.2	8.85343	Cst_c05190	1	47.2	10.0266
Cst_c09270	1	30.2	6.05131	Cst_c05200	1	55.2	10.8656
Cst_c09310	1	63.1	9.96531	Cst_c05220	1	9.6	5.84827
Cst_c09320	1	11.6	2.92889	Cst_c05230	1	8.2	4.27004
Cst_c09350	1	58.8	12.8255	Cst_c05240	1	23.7	8.64941
Cst_c09380	1	35.8	8.04517	Cst_c05250	1	52.6	8.7947
Cst_c09390	1	49.2	7.07832	Cst_c05260	1	94.3	13.1975
Cst_c09400	1	46.1	10.0066	Cst_c05270	1	56.8	12.5743
Cst_c09420	1	49.6	9.64541	Cst_c05280	1	57	10.9754
Cst_c09430	1	44.2	6.27395	Cst_c05290	1	56.3	11.111
Cst_c09440	1	45.1	8.12249	Cst_c05300	1	68.6	14.3449
Cst_c09460	1	56.2	10.3484	Cst_c05380	1	32.8	9.47503
Cst_c09470	1	66.7	10.0385	Cst_c05390	1	28.1	15.5295
Cst_c09480	1	41.2	9.49161	Cst_c05400	1	12.3	5.03237
Cst_c09490	1	57.7	11.0491	Cst_c05410	1	28.7	7.41979
Cst_c09560	1	22	4.98298	Cst_c05420	1	60.6	11.4487
Cst_c09570	1	56.2	11.1813	Cst_c05440	1	34.2	8.5861
Cst_c09580	1	33.8	6.80375	Cst_c05450	1	67.1	10.579
Cst_c09590	1	85.9	11.2934	Cst_c05490	1	34.7	9.21896
Cst_c09630	1	30.2	10.6877	Cst_c05500	1	43.7	10.4945
Cst_c09640	1	3	4.34907	Cst_c05510	1	49.4	11.7502
Cst_c09650	1	47.2	4.53271	Cst_c05530	1	14.5	7.30818
Cst_c09680	1	90.1	14.8398	Cst_c05540	1	10.2	5.36833
Cst_c09690	1	37.6	7.8959	Cst_c05550	1	42.1	7.74668
Cst_c09750	1	55.8	13.0024	Cst_c05570	1	49	8.02033
Cst_c09780	1	51	8.47327	Cst_c05580	1	87.1	11.9454
Cst_c09790	1	63.2	11.2497	Cst_c05590	1	27.8	9.71247
Cst_c09800	1	44.4	8.47873	Cst_c05620	1	49.1	10.2285
Cst_c09810	1	31.9	7.42975	Cst_c05630	1	30.3	7.59553
Cst_c09820	1	42	7.16732	Cst_c05640	1	18.7	6.17594
Cst_c09830	1	46.6	9.46711	Cst_c05650	1	14.9	6.1254
Cst_c09840	1	53.7	8.37841	Cst_c05670	1	26.4	7.66205
Cst_c09850	1	52.8	9.30725	Cst_c05710	1	56.1	9.86554
Cst_c09860	1	46	8.49067	Cst_c05730	1	46.5	10.9627
Cst_c09870	1	50.8	8.11396	Cst_c05740	1	20.1	8.08968
Cst_c09890	1	83.7	10.9244	Cst_c05750	1	47.7	11.0265
Cst_c09900	1	76.7	11.9026	Cst_c05760	1	81.5	13.5465
Cst_c09920	1	73.5	12.6226	Cst_c05770	1	26	6.15287
Cst_c09980	1	37.1	5.66933	Cst_c05780	1	5	6.95773
Cst_c09990	1	32.1	3.54398	Cst_c05820	1	11.1	7.09936
Cst_c10030	1	73.7	13.9921	Cst_c05830	1	52.7	11.942
Cst_c10040	1	1.3	4.07163	Cst_c05840	1	79.2	13.5277
Cst_c10050	1	4.4	0.693685	Cst_c05860	1	9.4	3.222
Cst_c10080	1	55.6	5.44987	Cst_c05880	1	53	12.1256
Cst_c10100	1	80.9	13.1758	Cst_c05890	1	36.8	10.0029
Cst_c10130	1	38.4	8.32598	Cst_c05900	1	52.5	11.1428
Cst_c10160	1	62.6	10.4397	Cst_c05910	1	65	11.1727
Cst_c10220	1	7.9	3.66015	Cst_c05930	1	52.8	7.69979
Cst_c10240	1	75.9	16.2977	Cst_c05940	1	14.4	9.16598
Cst_c10310	1	60.2	12.7991	Cst_c05970	1	12.7	5.36642
Cst_c10320	1	53	9.85654	Cst_c06000	1	50.1	8.58423
Cst_c10340	1	35.3	8.01172	Cst_c06020	1	81.6	13.0416
Cst_c10350	1	4.5	6.11331	Cst_c06040	1	68.6	12.9921
Cst_c10400	1	65.5	12.1198	Cst_c06060	1	55.7	11.9987
Cst_c10430	1	15.7	6.8674	Cst_c06140	1	64.9	11.8868
Cst_c10460	1	5.8	5.04833	Cst_c06190	1	44.8	11.367
Cst_c10470	1	5.8	3.27592	Cst_c06220	1	27.2	12.4243
Cst_c10510	1	15.2	4.51156	Cst_c06240	1	43.4	10.0759
Cst_c10630	1	5.7	2.45751	Cst_c06250	1	54.9	10.2797
Cst_c10670	1	72.1	8.85321	Cst_c06260	1	61	12.5418
Cst_c10680	1	75.2	8.29173	Cst_c06270	1	58.7	13.2611
Cst_c10700	1	6.8	2.32351	Cst_c06280	1	12	7.8719
Cst_c10710	1	56.3	8.17522	Cst_c06290	1	61.7	11.2334
Cst_c10720	1	4	6.43936	Cst_c06300	1	57.4	9.85093
Cst_c10730	1	23.6	8.37813	Cst_c06310	1	53.3	13.3092
Cst_c10740	1	11.8	3.86716	Cst_c06320	1	81	11.6773
Cst_c10750	1	29.3	6.21268	Cst_c06330	1	37.5	12.2368
Cst_c10780	1	24.9	6.38237	Cst_c06340	1	72.7	13.4504
Cst_c10790 Cst_c10800	2	65.9	12.894	Cst_c06350	1	82.3	13.2873
Cst_c10850	1	24	4.47753	Cst_c06360	1	19.5	9.34777
Cst_c10860	1	60.5	7.23303	Cst_c06380	1	40.9	9.3366
Cst_c10890	1	7	3.03697	Cst_c06410	1	34.5	8.4412
Cst_c10910	1	46.2	9.52929	Cst_c06420	1	21.9	6.18704
Cst_c10930	1	9.3	3.85734	Cst_c06430	1	14.2	4.36795
Cst_c10960	1	12.7	4.60208	Cst_c06440	1	33	7.92315
Cst_c10970	1	43.8	10.2222	Cst_c06450	1	23.6	6.15377
Cst_c10990	1	53.7	9.80207	Cst_c06490	1	44.8	7.59602
Cst_c11000	1	29.3	9.25385	Cst_c06500	1	18.1	7.04362
Cst_c11010	1	73.5	8.86746	Cst_c06510	1	20.3	7.88892
Cst_c11030	1	62	11.8918	Cst_c06520	1	22.8	8.85975
Cst_c11050	1	40.9	4.84146	Cst_c06530	1	55.8	10.9569
Cst_c11060	1	38.1	6.77532	Cst_c06540	1	29.6	7.34351
Cst_c11080	1	27.8	6.60421	Cst_c06550	1	85.2	14.3364
Cst_c11120	1	44.1	9.53018	Cst_c06570	1	13.1	7.96603
Cst_c11150	1	11.2	5.17112	Cst_c06580	1	22.2	7.38194
Cst_c11160	1	22.8	6.5847	Cst_c06590	1	52.9	11.1547
Cst_c11230	1	17.1	7.67138	Cst_c06610	1	20.3	8.02227
Cst_c11250	1	36.7	8.07286	Cst_c06620	1	38.6	9.20221
Cst_c11280	1	11.4	0.844364	Cst_c06630	1	56.2	13.7257
Cst_c11300	1	19.4	6.85761	Cst_c06640	1	72.5	13.4681
Cst_c11330	1	65.9	12.154	Cst_c06650	1	16	4.73922
Cst_c11340	1	24.2	6.506	Cst_c06670	1	77.5	13.0332
Cst_c11350	1	51.5	10.0245	Cst_c06680	1	7.2	4.316
Cst_c11360	1	31.8	6.76927	Cst_c06690	1	35.7	11.3759
Cst_c11390	1	22.8	8.50947	Cst_c06700	1	59.6	12.0295
Cst_c11400	1	53.9	6.15071	Cst_c06710	1	70.4	10.3428
Cst_c11420	1	44.2	9.65394	Cst_c06720	1	66.1	12.4118
Cst_c11440	1	20.2	3.90569	Cst_c06730	1	76.7	15.9552
Cst_c11450	1	69.2	12.1846	Cst_c06750	1	18.3	8.17704
Cst_c11480	1	77.2	13.2109	Cst_c06760	1	36	10.7192
Cst_c11490	1	28.3	3.97024	Cst_c06770	1	79.6	15.1638
Cst_c11530	1	62.1	9.90267	Cst_c06780	1	61.3	9.68286
Cst_c11540	1	67.4	12.0707	Cst_c06790	1	55.4	10.649
Cst_c11550	1	44.5	5.82569	Cst_c06800	1	19.5	6.46409
Cst_c11560	1	15.8	12.6219	Cst_c06880	1	38.1	12.1679
Cst_c11570	1	57.2	8.97142	Cst_c06910	1	7.2	4.61605
Cst_c11580	1	43.5	4.53034	Cst_c06930	1	70.9	14.2068
Cst_c11600	1	39.4	6.86095	Cst_c06950	1	49.5	9.18928
Cst_c11620	1	22.1	5.63814	Cst_c06960	1	14.7	6.11867
Cst_c11640	1	81.2	5.62624	Cst_c06970	1	37.5	8.9033
Cst_c11690	1	27.1	5.82579	Cst_c06980	1	30.9	8.57151
Cst_c11700	1	69.6	14.9299	Cst_c07130	1	20	7.67644
Cst_c11710	1	50.2	8.67404	Cst_c07140	1	23.2	7.32098
Cst_c11810	1	66.3	12.2869	Cst_c07150	1	33.3	8.66867
Cst_c11890	1	70.5	11.0099	Cst_c07160	1	74.7	10.356
Cst_c11900	1	88.4	9.3016	Cst_c07170	1	7.6	8.80282
Cst_c11910	1	83.5	12.1728	Cst_c07180	1	43.4	10.5321
Cst_c11940	1	64.9	8.11018	Cst_c07190	1	62.1	11.8197
Cst_c11950	1	53.9	6.34914	Cst_c07200	1	46.3	12.7444
Cst_c11960	1	92.6	12.0883	Cst_c07210	1	33.3	10.797
Cst_c11970	1	41.6	9.76275	Cst_c07220	1	40.6	7.55233
Cst_c12000	1	82.7	14.7012	Cst_c07230	1	26.9	9.34113
Cst_c12010	1	69.2	12.1981	Cst_c07240	1	8.9	5.08316
Cst_c12020	1	69.7	14.0673	Cst_c07250	1	59.1	10.9776
Cst_c12030	1	61.8	11.621	Cst_c07270	1	4.5	5.64325
Cst_c12040	1	27.7	6.20003	Cst_c07290	1	21.6	5.60855
Cst_c12050	1	43.8	5.74074	Cst_c07300	1	27	6.45583
Cst_c12090	1	21.9	6.40458	Cst_c07310	1	46.2	8.98517
Cst_c12100	1	35.7	8.00363	Cst_c07330	1	10.9	6.47839
Cst_c12150	1	33.1	6.89853	Cst_c07340	1	29.6	9.38851
Cst_c12180	1	11.8	4.70506	Cst_c07350	1	11	5.87873
Cst_c12240	1	29.5	7.45506	Cst_c07360	1	3.6	1.89229
Cst_c12250	1	36.8	4.24047	Cst_c07380	1	20.7	6.11549
Cst_c12290	1	17.6	4.18894	Cst_c07430	1	40.6	9.18293
Cst_c12320	1	26.7	7.59328	Cst_c07450	1	41.9	12.1734
Cst_c12330	1	29.1	4.99137	Cst_c07480	1	51.8	8.39675
Cst_c12340	1	23.9	5.81155	Cst_c07530	1	30.8	8.4953
Cst_c12350	1	18.3	4.76523	Cst_c07540	1	82.1	12.8588
Cst_c12360	1	44.5	3.01744	Cst_c07550	1	55.4	13.2614
Cst_c12390	1	29.5	4.13766	Cst_c07560	1	17.1	8.97277
Cst_c12400	1	98.2	10.3536	Cst_c07570	1	76.9	16.0735
Cst_c12410	1	34.2	4.86103	Cst_c07580	1	44.5	10.8982
Cst_c12420	1	25.1	5.48868	Cst_c07590	1	41	11.5556
Cst_c12560	1	45.5	10.8389	Cst_c07600	1	75.8	11.2221
Cst_c12640	1	53.8	9.74838	Cst_c07610	1	68.6	12.5421
Cst_c12670	1	12.9	4.16947	Cst_c07640	1	27.9	8.21154
Cst_c12680	1	16.6	6.57596	Cst_c07650	1	27.3	7.13351
Cst_c12690	1	37.3	7.6506	Cst_c07660	1	24.6	9.43913
Cst_c12700	1	78.4	12.997	Cst_c07670	1	24.6	6.9157
Cst_c12710	1	68.4	10.1752	Cst_c07680	1	67.9	13.7886
Cst_c12720	1	60.5	15.3864	Cst_c07690	1	69.6	13.1125
Cst_c12730	1	64.9	11.9407	Cst_c07710	1	79.7	11.8326
Cst_c12790	1	10.9	4.33239	Cst_c07720	1	18.3	7.79735
Cst_c12820	1	19.2	3.36938	Cst_c07730	1	61.3	14.257
Cst_c12840	1	49.4	8.62449	Cst_c07740	1	58	11.9895
Cst_c12850	1	53.5	7.95812	Cst_c07750	1	50.8	14.7538
Cst_c12860	1	58.3	9.27014	Cst_c07760	1	6.2	3.10898
Cst_c12910	1	83.8	14.5892	Cst_c07770	1	28.7	9.28984
Cst_c12920	1	64.7	10.6441	Cst_c07790	1	14.5	8.1521
Cst_c12930	1	62.7	9.89508	Cst_c07820	1	83.3	14.3762
Cst_c12940	1	53.4	8.43654	Cst_c07830	1	24.6	7.36297
Cst_c12950	1	48	8.62256	Cst_c07840	1	19.1	5.45563
Cst_c12960	1	56.2	8.10668	Cst_c07850	1	75.6	9.94529
Cst_c12970	1	32	6.45342	Cst_c07860	1	70.1	12.2329
Cst_c12990	1	34.4	8.22374	Cst_c07880	1	61.8	13.5049
Cst_c13010	1	36.3	8.61835	Cst_c07890	1	20.5	6.63689
Cst_c13020	1	39.1	8.44768	Cst_c07900	1	70.9	11.008
Cst_c13030	1	19.4	5.4956	Cst_c07920	1	53.3	8.89902
Cst_c13040	1	62.5	8.90818	Cst_c07930	1	56.8	10.6533
Cst_c13080	1	48.9	7.71816	Cst_c07940	1	42.4	10.062
Cst_c13100	1	22.3	4.64933	Cst_c07950	1	41.8	9.68549
Cst_c13120	1	49.1	7.5091	Cst_c07960	1	32.6	9.87464
Cst_c13160	1	4.9	2.47132	Cst_c08000	1	49.3	9.82847
Cst_c13180	1	30.8	5.14129	Cst_c08010	1	14.1	7.80835
Cst_c13190	1	33.8	7.66347	Cst_c08040	1	40.3	9.177
Cst_c13210	1	3.1	2.7313	Cst_c08070	1	56.1	10.4391
Cst_c13220	1	52.4	13.846	Cst_c08100	1	52.7	10.4867
Cst_c13230	1	43.5	15.5136	Cst_c08120	1	82	13.676
Cst_c13240	1	45.5	9.4379	Cst_c08140	1	28.9	10.0528
Cst_c13260	1	31.2	10.6333	Cst_c08150	1	42.9	8.54136
Cst_c13270	1	32.6	10.0262	Cst_c08160	1	60.6	13.0222
Cst_c13290	1	7.6	8.64379	Cst_c08180	1	80.8	14.6674
Cst_c13310	1	53	6.83807	Cst_c08190	1	81.1	14.968
Cst_c13340	1	70.6	13.7503	Cst_c08300	1	64	12.6233
Cst_c13400	1	26.2	6.65782	Cst_c08310	1	58.7	11.8964
Cst_c13430	1	18.8	8.28009	Cst_c08320	1	64.4	10.345
Cst_c13440	1	65.1	13.6968	Cst_c08330	1	14.7	8.68711
Cst_c13470	1	23.7	4.79965	Cst_c08340	1	35.1	8.12907
Cst_c13490	1	63.3	10.2225	Cst_c08370	1	49.7	9.39992
Cst_c13520	1	13.2	8.18136	Cst_c08380	1	34.2	9.28222
Cst_c13530	1	49.8	9.30199	Cst_c08390	1	11.8	6.26574
Cst_c13680	1	60.3	8.72368	Cst_c08400	1	17.8	6.53264
Cst_c13690	1	13.5	5.08625	Cst_c08410	1	42.3	10.7998
Cst_c13700	1	60.3	9.69105	Cst_c08420	1	83.8	16.3821
Cst_c13710	1	27.6	4.15813	Cst_c08430	1	22.7	12.101
Cst_c13730	1	4.4	4.07769	Cst_c08440	1	33.4	12.251
Cst_c13770	1	45.5	7.51537	Cst_c08450	1	25.7	7.79289
Cst_c13790	1	25.2	7.72376	Cst_c08460	1	19.6	9.21508
Cst_c13810	1	21.9	5.93206	Cst_c08470	1	58	14.2453
Cst_c13830	1	46.3	8.28346	Cst_c08480	1	46.1	9.53466
Cst_c13840	1	28.4	6.56719	Cst_c08490	1	30.2	7.09577
Cst_c13850	1	17.3	6.36796	Cst_c08510	1	57.3	11.0602
Cst_c13860	1	51.5	14.3026	Cst_c08530	1	88.4	14.7735
Cst_c13880	1	36	7.99284	Cst_c08540	1	26.2	9.68541
Cst_c13910	1	47.4	8.26284	Cst_c08550	1	57.8	14.8912
Cst_c13940	1	29	5.02968	Cst_c08560	1	70.9	10.7517
Cst_c13970	1	2.2	1.12241	Cst_c08570	1	27.6	10.6119
Cst_c13990	1	92.1	11.6496	Cst_c08580	1	12.9	10.009
Cst_c14000	1	29.7	5.95099	Cst_c08590	1	68.1	13.835
Cst_c14020	1	12.6	3.55483	Cst_c08600	1	42.6	12.0723
Cst_c14060	1	53.5	10.8301	Cst_c08610	1	39.8	9.43028
Cst_c14090	1	24.6	4.52625	Cst_c08620	1	35.2	9.18549
Cst_c14120	1	21.1	4.83092	Cst_c08630	1	45	10.1164
Cst_c14140	1	9.2	1.94831	Cst_c08640	1	38.8	8.47589
Cst_c14150	1	34.3	6.64958	Cst_c08650	1	53.4	10.2165
Cst_c14160	1	29.2	12.7278	Cst_c08660	1	45.7	10.9076
Cst_c14170	1	40.2	7.80429	Cst_c08670	1	15.8	6.41162
Cst_c14250	1	23.3	4.89517	Cst_c08680	1	72.2	11.6874
Cst_c14260	1	24.1	8.47859	Cst_c08710	1	57.4	12.9184
Cst_c14270	1	4.4	3.98358	Cst_c08720	1	74	14.0381
Cst_c14320	1	35.4	6.8589	Cst_c08730	1	64.1	12.7269
Cst_c14360	1	27.8	3.34437	Cst_c08740	1	39.6	8.40894
Cst_c14420	1	33.8	5.83312	Cst_c08750	1	61.7	11.0797
Cst_c14440	1	73.1	9.91127	Cst_c08760	1	50.9	10.0848
Cst_c14460	1	66.1	10.6662	Cst_c08770	1	42.1	8.3223
Cst_c14490	1	53.6	10.5374	Cst_c08780	1	11.5	5.42898
Cst_c14530	1	5	7.9847	Cst_c08790	1	81.5	16.1923
Cst_c14570	1	75.3	12.8348	Cst_c08800	1	16	6.53911
Cst_c14580	1	71	12.1728	Cst_c08810	1	60.1	15.0959
Cst_c14620	1	54.6	10.0434	Cst_c08820	1	87.4	14.0328
Cst_c14650	1	73.9	10.0544	Cst_c08830	1	14.6	6.0184
Cst_c14660	1	45.6	7.9962	Cst_c08850	1	61.9	11.6692
Cst_c14700	1	45	10.3463	Cst_c08860	1	48.4	11.8378
Cst_c14750	1	32.2	5.74772	Cst_c08870	1	42.3	10.1235
Cst_c14760	1	5.3	4.77403	Cst_c08880	1	43.3	10.7612
Cst_c14770	1	12.1	5.47058	Cst_c08890	1	35.6	9.03858
Cst_c14790	1	6.6	2.26825	Cst_c08900	1	25.8	7.51049
Cst_c14810	1	32.4	3.144	Cst_c08910	1	70.3	12.1408
Cst_c14820	1	24.1	8.48494	Cst_c08940	1	16	7.79535
Cst_c14890	1	35	7.00716	Cst_c09030	1	17	5.13316
Cst_c14900	1	17.2	7.12853	Cst_c09040	1	20.1	6.18397
Cst_c14920	1	65.2	8.99925	Cst_c09050	1	14.7	5.5617
Cst_c14940	1	45.5	6.13471	Cst_c09080	1	2.6	6.23416
Cst_c14950	1	38.2	8.54334	Cst_c09110	1	72.4	12.5093
Cst_c14970	1	20.4	6.98112	Cst_c09130	1	82.3	13.2506
Cst_c14980	1	20.3	6.6808	Cst_c09140	1	2.9	4.66974
Cst_c15010	1	40.3	2.18239	Cst_c09150	1	77	13.4466
Cst_c15020	1	44.2	7.85382	Cst_c09160	1	76.2	12.6767
Cst_c15090	1	22	7.86471	Cst_c09170	1	55.2	8.88059
Cst_c15110	1	54.5	5.28271	Cst_c09180	1	54.7	9.81302
Cst_c15160	1	22	4.27898	Cst_c09200	1	17.1	9.44058
Cst_c15230	1	2.9	6.39361	Cst_c09230	1	53.6	9.84136
Cst_c15250	1	3	1.27147	Cst_c09260	1	41.3	10.9858
Cst_c15280	1	58	10.8341	Cst_c09270	1	47.7	10.8169
Cst_c15290	1	72.2	12.1022	Cst_c09280	1	10.7	4.14926
Cst_c15320	1	46.7	8.64386	Cst_c09300	1	69.6	14.2988
Cst_c15330	1	26.9	7.0974	Cst_c09310	1	79.4	13.7119
Cst_c15340	1	27.9	7.02172	Cst_c09320	1	69.1	11.0097
Cst_c15360	1	25	5.90831	Cst_c09350	1	76.5	14.5692
Cst_c15370	2	20.1	6.38615	Cst_c09360	1	54.9	13.255
Cst_c15410	1	34.6	9.82262	Cst_c09370	1	7.2	5.92983
Cst_c15450	1	3.5	7.08277	Cst_c09380	1	52.3	12.2399
Cst_c15490	1	32.7	8.34953	Cst_c09390	1	60.6	11.4226
Cst_c15520	1	26.5	4.75971	Cst_c09400	1	75.2	14.6893
Cst_c15570	1	41.7	8.3394	Cst_c09410	1	24.7	5.28749
Cst_c15590	1	79.2	11.6843	Cst_c09420	1	72.7	14.0956
Cst_c15600	1	51.5	10.5094	Cst_c09430	1	77.9	14.2059
Cst_c15630	1	45	8.70651	Cst_c09440	1	82.5	14.2627
Cst_c15640	1	24.8	9.04754	Cst_c09450	1	23.9	7.59651
Cst_c15650	1	52	7.75657	Cst_c09460	1	60.5	12.744
Cst_c15760	1	3.9	1.58713	Cst_c09470	1	59	11.402
Cst_c15830	1	62.4	8.53606	Cst_c09480	1	41.5	12.1835
Cst_c15850	1	3.7	0.977044	Cst_c09490	1	61.2	12.6073
Cst_c15870	1	60.7	8.35999	Cst_c09500	1	29.6	9.64955
Cst_c15880	1	34.6	6.39508	Cst_c09510	1	58	10.4314
Cst_c15890	1	37.4	10.9389	Cst_c09530	1	12.1	5.60204
Cst_c15960	1	64.7	12.9513	Cst_c09540	1	5.2	3.17293
Cst_c15970	1	3.3	2.69241	Cst_c09550	1	5.4	4.69066
Cst_c16000	1	37.7	11.9795	Cst_c09560	1	64.1	11.5023
Cst_c16090	1	75.2	6.81212	Cst_c09570	1	68.7	13.19
Cst_c16140	1	52.5	7.69663	Cst_c09580	1	42.8	10.4251
Cst_c16150	1	44.2	11.5487	Cst_c09590	1	85.9	12.8451
Cst_c16160	1	31.1	9.01624	Cst_c09600	1	35.1	9.67389
Cst_c16170	1	60.4	10.5677	Cst_c09610	1	45.6	9.60021
Cst_c16190	1	41.2	10.2622	Cst_c09620	1	28.2	10.2019
Cst_c16220	1	10.6	4.06834	Cst_c09630	1	30.2	9.29598
Cst_c16230	1	23.7	7.28659	Cst_c09640	1	57.7	11.0282
Cst_c16260	1	1.5	4.1249	Cst_c09650	1	62.3	10.5085
Cst_c16310	1	7	2.20674	Cst_c09660	1	6.7	5.35962
Cst_c16330	1	29.2	6.17699	Cst_c09680	1	92.7	16.1214
Cst_c16390	1	5.6	4.43943	Cst_c09690	1	48.5	10.4792
Cst_c16410	1	21.9	0.736384	Cst_c09710	1	37.5	8.58721
Cst_c16420	1	4.6	2.55545	Cst_c09720	1	23	8.02776
Cst_c16480	1	28.2	5.66831	Cst_c09730	1	65.6	9.75526
Cst_c16530	1	21.4	4.93973	Cst_c09750	1	48.4	12.6105
Cst_c16540	1	14.8	6.48018	Cst_c09760	1	13.6	7.45344
Cst_c16550	1	63.9	10.484	Cst_c09770	1	15	9.44928
Cst_c16560	1	36.9	8.53296	Cst_c09780	1	51.4	9.29977
Cst_c16570	1	50.8	8.62496	Cst_c09790	1	56.8	11.9123
Cst_c16590	1	78.1	10.4456	Cst_c09800	1	47.7	9.44182
Cst_c16630	1	8.8	4.05433	Cst_c09810	1	47	11.5926
Cst_c16640	1	63.1	10.5373	Cst_c09820	1	50	11.018
Cst_c16670	1	44.7	6.74301	Cst_c09830	1	53.3	12.3218
Cst_c16680	1	46.2	7.37411	Cst_c09840	1	79.2	11.5855
Cst_c16700	1	84.7	13.0514	Cst_c09850	1	31.5	13.813
Cst_c16750	1	80.6	11.2421	Cst_c09860	1	58.1	10.1004
Cst_c16860	1	47.9	8.15503	Cst_c09870	1	58.6	11.135
Cst_c16870	1	31.4	8.17512	Cst_c09880	1	16.1	6.9517
Cst_c16880	1	1.5	2.46816	Cst_c09890	1	90.7	15.5704
Cst_c16890 Cst_c11370	2	79.1	12.3538	Cst_c09900	1	99.1	15.3703
Cst_c16930	1	13.3	3.59373	Cst_c09920	1	75.8	13.6141
Cst_c16960	1	54.2	9.37243	Cst_c09940	1	15.9	8.0878
Cst_c17030	1	55.7	13.7932	Cst_c09950	1	11.2	7.53568
Cst_c17060	1	17.3	3.70027	Cst_c09980	1	79.3	12.9406
Cst_c17100	1	25.6	7.63678	Cst_c09990	1	68.8	12.1492
Cst_c17130	1	58.8	9.66381	Cst_c10000	1	52.9	11.2403
Cst_c17160	1	40.1	7.98451	Cst_c10010	1	4.5	9.62625
Cst_c17230	1	39.5	7.95149	Cst_c10020	1	9.9	8.46086
Cst_c17240	1	41.4	5.13102	Cst_c10030	1	76.6	16.5787
Cst_c17250	1	25.6	7.43875	Cst_c10040	1	44.5	13.44
Cst_c17270	1	53.4	9.64508	Cst_c10050	1	52.6	13.0064
Cst_c17280	1	42.4	8.02205	Cst_c10080	1	78.8	11.7436
Cst_c17290	1	41.4	7.99248	Cst_c10090	1	32.7	8.75121
Cst_c17310	1	74.3	13.9984	Cst_c10100	1	91.4	15.447
Cst_c17320	1	39.5	8.69699	Cst_c10130	1	19.8	7.77096
Cst_c17350	1	12.4	3.4424	Cst_c10140	1	15.4	7.74342
Cst_c17370	1	26.1	5.55054	Cst_c10150	1	3.3	8.31963
Cst_c17380	1	35.6	8.11969	Cst_c10160	1	73.2	13.146
Cst_c17420	1	36	9.82861	Cst_c10210	1	18.5	6.12269
Cst_c17510	1	63.4	10.6251	Cst_c10220	1	12.6	6.89425
Cst_c17560	1	18.8	4.44153	Cst_c10230	1	3	3.8078
Cst_c17680	1	7.3	6.23777	Cst_c10240	1	48.1	12.3446
Cst_c17780	1	4.8	2.49163	Cst_c10260	1	25.5	10.3633
Cst_c17860	1	51.3	8.17868	Cst_c10270	1	47.5	11.235
Cst_c17940	1	26.7	6.01612	Cst_c10290	1	51.8	10.611
Cst_c17960	1	16.9	6.32219	Cst_c10300	1	17.2	7.26589
Cst_c17970	1	34.1	7.79667	Cst_c10310	1	58.4	13.3721
Cst_c17980	1	22.3	6.68694	Cst_c10320	1	58.6	11.8746
Cst_c17990	1	40.9	6.85503	Cst_c10340	1	55.8	10.7011
Cst_c18000	1	6.9	3.00279	Cst_c10350	1	29.6	7.66094
Cst_c18060	1	77.3	12.2824	Cst_c10360	1	3.1	4.69247
Cst_c18120	1	6.9	2.35575	Cst_c10390 Cst_c02120	2	11.6	6.74086
Cst_c18130	1	9.5	3.93461	Cst_c10400	1	55.4	8.74925
Cst_c18150	1	43.3	7.01581	Cst_c10430	1	35.9	8.71662
Cst_c18180	1	49.9	8.63323	Cst_c10450	1	7.9	9.04346
Cst_c18310	1	55.4	10.2395	Cst_c10460	1	44.3	9.52466
Cst_c18380	1	71.2	13.7381	Cst_c10470	1	36.3	11.3518
Cst_c18390	1	72.8	15.7289	Cst_c10480	1	49.7	9.48863
Cst_c18400	1	48.2	8.37003	Cst_c10510	1	27.3	7.72307
Cst_c18410	1	91.6	14.1937	Cst_c10550	1	12.9	6.26399
Cst_c18420	1	97.1	15.1635	Cst_c10620	1	14.6	7.69139
Cst_c18460	1	45.2	8.84608	Cst_c10630	1	22.9	7.69733
Cst_c18530	1	19	5.67205	Cst_c10650	1	50.1	9.88739
Cst_c18540	1	80.2	13.7156	Cst_c10660	1	5	2.51369
Cst_c18640	1	19.8	6.13014	Cst_c10670	1	75.4	14.2368
Cst_c18650	1	18	9.52143	Cst_c10680	1	75.6	9.54363
Cst_c18710	1	13.2	4.25175	Cst_c10690	1	30.5	5.3844
Cst_c18750	1	72.5	10.5398	Cst_c10700	1	60.3	12.4319
Cst_c18760	1	22.8	3.61293	Cst_c10710	1	64	11.5249
Cst_c18780	1	11.4	6.14849	Cst_c10720	1	1.2	8.45265
Cst_c18800	1	5.4	1.71745	Cst_c10730	1	19.5	6.13884
Cst_c18810	1	51	10.407	Cst_c10740	1	52.8	10.4548
Cst_c18820	1	67.5	8.00038	Cst_c10750	1	53.7	10.9519
Cst_c18830	1	47.4	8.2004	Cst_c10760	1	16	5.89924
Cst_c18840	1	49.5	8.0253	Cst_c10780	1	49.5	9.62999
Cst_c18890	1	45.5	7.444	Cst_c10790 Cst_c10800	2	30.9	8.8918
Cst_c18920	1	12.1	5.23127	Cst_c10850	1	29.2	11.8397
Cst_c18960	1	97.1	16.1061	Cst_c10860	1	67.6	13.4779
Cst_c18970	1	52.4	16.1013	Cst_c10870	1	64.9	13.0459
Cst_c19060	1	13.6	2.44109	Cst_c10880	1	18.8	7.24692
Cst_c19090	1	61.8	8.39762	Cst_c10890	1	59.2	12.1896
Cst_c19170	1	45.6	7.63167	Cst_c10900	1	79.3	12.8555
Cst_c19180	1	27.2	8.03806	Cst_c10910	1	46.5	10.9182
Cst_c19200	1	6.7	6.23613	Cst_c10920	1	13.5	4.97562
Cst_c19300	1	4.3	1.31971	Cst_c10930	1	31.7	6.97607
Cst_c19320	1	60.7	14.2725	Cst_c10960	1	25.3	7.67339
Cst_c19440	1	51.9	6.69026	Cst_c10970	1	80.4	13.9572
Cst_c19460	1	31.2	10.6802	Cst_c10980	1	37.4	8.91336
Cst_c19470	1	26.9	7.61779	Cst_c10990	1	87.4	15.2652
Cst_c19490	1	18.9	8.07916	Cst_c11000	1	62.1	15.6031
Cst_c19580	1	9.5	4.86399	Cst_c11010	1	80.6	15.6951
Cst_c19600	1	67	10.0811	Cst_c11030	1	90.4	14.0111
Cst_c19670	1	59.3	9.9781	Cst_c11040	1	48.7	10.764
Cst_c19700	1	65.5	13.8079	Cst_c11050	1	54.5	13.5709
Cst_c19740	1	89.7	11.8196	Cst_c11060	1	54.2	15.5082
Cst_c19750	1	39.9	8.17562	Cst_c11070	1	43.4	10.3962
Cst_c19760	1	4.2	2.09341	Cst_c11080	1	60.5	10.6948
Cst_c19770	1	21.9	6.03739	Cst_c11090	1	13.6	8.51572
Cst_c19850	1	11.9	5.75658	Cst_c11100	1	5.4	9.10765
Cst_c19900	1	51.1	11.1468	Cst_c11110	1	41.1	11.1257
Cst_c19910	1	6.8	1.73951	Cst_c11120	1	52.6	11.8952
Cst_c19960	1	20.5	6.39968	Cst_c11130	1	32.5	9.0665
Cst_c20000	1	7.9	3.47922	Cst_c11140	1	14.1	4.39332
Cst_c20040	1	31.1	7.35928	Cst_c11150	1	20.6	6.97776
Cst_c20050	1	62.5	9.23203	Cst_c11230	1	19.4	7.65312
Cst_c20060	1	64.9	10.3649	Cst_c11240	1	50.1	9.52975
Cst_c20070	1	19	3.80707	Cst_c11250	1	24.8	5.97656
Cst_c20080	1	35.9	6.39052	Cst_c11260	1	6.2	4.66309
Cst_c20090	1	38.3	5.1685	Cst_c11270	1	8.8	5.82075
Cst_c20100	1	53.1	8.80663	Cst_c11280	1	22	5.60377
Cst_c20120	1	38.8	9.49151	Cst_c11300	1	18.6	6.77729
Cst_c20140	1	8.4	4.78604	Cst_c11330	1	55.8	12.1088
Cst_c20170	1	5.1	1.37407	Cst_c11340	1	15.1	5.30501
Cst_c20190	1	35.7	7.25861	Cst_c11350	1	68.9	11.9036
Cst_c20210	1	73.5	12.9933	Cst_c11360	1	59.4	12.3686
Cst_c20220	1	60.3	10.4128	Cst_c11370	1	33.3	8.95164
Cst_c20230	1	23.7	2.52588	Cst_c11380	1	27	7.7738
Cst_c20240	1	13.8	4.95198	Cst_c11390	1	45.9	10.2564
Cst_c20250	1	6.5	4.3424	Cst_c11400	1	66.5	10.3567
Cst_c20260	1	16.3	6.94828	Cst_c11420	1	51.4	11.8776
Cst_c20280	1	17	3.87149	Cst_c11430	1	41.2	8.70838
Cst_c20300	1	72.4	12.5368	Cst_c11440	1	56.6	11.4087
Cst_c20310	1	62.2	10.1365	Cst_c11450	1	90.3	14.5441
Cst_c20340	1	32.2	9.54224	Cst_c11480	1	88.8	15.6625
Cst_c20360	1	9.7	4.85543	Cst_c11490	1	63.9	10.3137
Cst_c20380	1	53.4	8.06955	Cst_c11500	1	9.5	8.77687
Cst_c20430	1	34.2	4.90821	Cst_c11510	1	31.8	8.74298
Cst_c20450	1	35.1	3.92493	Cst_c11520	1	43.7	10.8386
Cst_c20460	1	23	6.12269	Cst_c11530	1	79.7	12.7361
Cst_c20570	1	56.1	8.6061	Cst_c11540	1	67.4	14.3353
Cst_c20590	1	11.8	4.61843	Cst_c11550	1	82.4	13.6042
Cst_c20600	1	14.7	4.10879	Cst_c11560	1	15.8	12.9357
Cst_c20610	1	16.4	6.88509	Cst_c11570	1	69.3	12.6926
Cst_c20630	1	26.2	8.80161	Cst_c11580	1	45.2	10.0698
Cst_c20640	1	34.4	6.66641	Cst_c11590	1	12.4	6.45207
Cst_c20700	1	15.6	4.41774	Cst_c11600	1	87.5	13.6328
Cst_c20710	1	27.3	3.22926	Cst_c11610	1	18.1	13.542
Cst_c20720	1	7.6	0.113249	Cst_c11620	1	48.8	11.4202
Cst_c20730	1	20.7	7.36344	Cst_c11630	1	52.3	9.90773
Cst_c20740	1	52.3	11.9214	Cst_c11640	1	91.2	14.7433
Cst_c20760	1	12.3	6.96343	Cst_c11670	1	51.8	9.94464
Cst_c20780	1	59.5	12.8514	Cst_c11680	1	32.5	8.54105
Cst_c20790	1	70.3	10.02	Cst_c11700	1	49.7	10.0654
Cst_c20800	1	87	12.0276	Cst_c11710	1	58.4	11.2425
Cst_c20810	1	88.1	14.0223	Cst_c11730	1	39.4	4.43195
Cst_c20860	1	32.8	7.19186	Cst_c11760	1	56	13.0823
Cst_c20890	1	65.7	12.6158	Cst_c11810	1	43.3	10.0231
Cst_c20910	1	50.5	7.39991	Cst_c11850	1	23.9	10.1532
Cst_c20960	1	21.9	6.49415	Cst_c11860	1	30.5	9.84507
Cst_c20980	1	46.8	8.11628	Cst_c11870	1	35.8	7.00279
Cst_c20990	1	47.5	8.45297	Cst_c11880	1	16.8	9.52999
Cst_c21050	1	43.6	7.66961	Cst_c11890	1	71.7	13.2172
Cst_c21060	1	20	6.8628	Cst_c11900	1	80.1	13.4268
Cst_c21080	1	55.1	10.4225	Cst_c11910	1	84.7	14.2744
Cst_c21090	1	56.2	11.242	Cst_c11930	1	71.8	12.1626
Cst_c21120	1	57.8	9.19952	Cst_c11940	1	68.8	16.2956
Cst_c21140	1	58.7	10.542	Cst_c11950	1	73.7	16.228
Cst_c21160	1	30	8.71168	Cst_c11960	1	67.6	14.966
Cst_c21180	1	46.1	9.1557	Cst_c11970	1	46.7	11.4725
Cst_c21200	1	2.9	4.05091	Cst_c11980	1	51.2	10.3336
Cst_c21210	1	57	8.17299	Cst_c11990	1	15.4	10.1406
Cst_c21220	1	77.2	10.9103	Cst_c12000	1	30.2	7.84441
Cst_c21230	1	47.2	5.88577	Cst_c12010	1	49.6	9.8721
Cst_c21240	1	26.4	5.20817	Cst_c12020	1	64.8	11.8995
Cst_c21250	1	30.4	10.5856	Cst_c12030	1	13	7.31865
Cst_c21270	1	15.7	6.55635	Cst_c12040	1	36.6	9.49881
Cst_c21290	1	35.7	5.90313	Cst_c12050	1	61.2	10.394
Cst_c21350	1	44.7	12.153	Cst_c12060	1	55.9	8.24993
Cst_c21360	1	31.5	8.13902	Cst_c12080	1	23.3	10.0286
Cst_c21390	1	34.7	8.16347	Cst_c12090	1	43.2	9.53932
Cst_c21470	1	37.5	5.79576	Cst_c12100	1	41.5	8.80339
Cst_c21490	1	81.5	14.1094	Cst_c12130	1	15.7	5.92098
Cst_c21500	1	44	6.48463	Cst_c12140	1	3.5	3.90601
Cst_c21520	1	81.6	11.4366	Cst_c12150	1	72.1	11.4944
Cst_c21540	1	24.3	4.50555	Cst_c12160	1	34	8.21134
Cst_c21630	1	39.1	9.92023	Cst_c12170	1	40.4	10.3069
Cst_c21640	1	27.1	5.92295	Cst_c12180	1	31.5	9.82611
Cst_c21680	1	65.7	12.4681	Cst_c12230	1	37.2	10.3799
Cst_c21740	1	51.5	5.77752	Cst_c12240	1	41	10.3524
Cst_c21770	1	3.3	1.43093	Cst_c12250	1	67.4	13.0738
Cst_c21810	1	56.4	8.83595	Cst_c12280	1	40.2	10.5285
Cst_c21820	1	80.4	11.3092	Cst_c12290	1	64.7	13.1559
Cst_c21830	1	85.9	15.8729	Cst_c12300	1	4.6	7.51566
Cst_c21890	1	21.2	6.27548	Cst_c12310	1	7.3	11.5388
Cst_c21900	1	39	8.02585	Cst_c12320	1	61.1	14.232
Cst_c21930	1	70.4	13.2219	Cst_c12330	1	39.8	9.10496
Cst_c21960	1	50.8	9.69324	Cst_c12340	1	55.1	9.9033
Cst_c21990	1	35.4	10.7235	Cst_c12350	1	29.2	8.45388
Cst_c22020	1	73.5	10.2495	Cst_c12360	1	79.6	10.2623
Cst_c22050	1	47.5	5.4758	Cst_c12380	1	36.6	9.02889
Cst_c22100	1	40.9	8.76716	Cst_c12390	1	73.6	10.7233
Cst_c22110	1	31	10.2319	Cst_c12400	1	98.2	11.2893
Cst_c22180	1	54.8	8.77005	Cst_c12410	1	62.5	11.2524
Cst_c22220	1	12.4	1.68213	Cst_c12420	1	61.2	9.87458
Cst_c22250	1	52.2	9.99939	Cst_c12430	1	14	6.91479
Cst_c22300	1	41.6	13.6724	Cst_c12440	1	26.5	8.39667
Cst_c22340	1	38.8	3.37616	Cst_c12450	1	43.7	10.0751
Cst_c22370	1	27.8	6.68132	Cst_c12460	1	49.2	10.2574
Cst_c22410	1	60.1	8.15331	Cst_c12470	1	46.3	9.81427
Cst_c22440	1	32.2	7.63834	Cst_c12480	1	4.4	10.6471
Cst_c22450	1	12	4.53805	Cst_c12490	1	54.7	11.4731
Cst_c22490	1	24.8	7.28038	Cst_c12500	1	42.2	11.1521
Cst_c22520	1	36	7.42028	Cst_c12620	1	14.5	8.49359
Cst_c22580	1	78.8	12.4797	Cst_c12640	1	31.5	8.54289
Cst_c22590	1	70.6	12.8975	Cst_c12710	1	47.9	8.96541
Cst_c22600	1	68.4	10.9038	Cst_c12720	1	33	8.69692
Cst_c22640	1	69.3	6.88326	Cst_c12730	1	75.9	13.8717
Cst_c22670	1	29.5	8	Cst_c12740	1	47.3	8.74753
Cst_c22690	1	13.9	6.11298	Cst_c12750	1	17.6	6.99319
Cst_c22720	1	31.2	6.27658	Cst_c12760	1	68.5	11.5499
Cst_c22750	1	41.9	9.62586	Cst_c12790	1	9.7	6.66026
Cst_c22800	1	79	10.8232	Cst_c12800	1	35.5	8.21454
Cst_c22810	1	68.1	10.322	Cst_c12810	1	27.3	8.52632
Cst_c22840	1	78.8	7.52655	Cst_c12820	1	25.8	10.1283
Cst_c22850	1	36.3	7.84381	Cst_c12830	1	30.1	8.3844
Cst_c22860	1	58.6	10.0948	Cst_c12840	1	43.6	10.2577
Cst_c22870	1	11.5	5.97177	Cst_c12850	1	64.3	11.1759
Cst_c22890	1	9.5	1.57684	Cst_c12860	1	58.1	12.1759
Cst_c22900	1	73.2	10.0022	Cst_c12870	1	44	9.6899
Cst_c22910	1	71.1	10.0354	Cst_c12910	1	92.9	16.4644
Cst_c22970	1	64.6	13.0938	Cst_c12920	1	84.3	14.048
Cst_c22990	1	17.2	4.49566	Cst_c12930	1	77.5	13.3844
Cst_c23000	1	32.9	4.98397	Cst_c12940	1	92.4	13.7359
Cst_c23010	1	35.7	7.23935	Cst_c12950	1	53.8	11.8561
Cst_c23050	1	75.7	8.68787	Cst_c12960	1	59.6	12.393
Cst_c23070	1	24.9	7.64414	Cst_c12970	1	69.2	11.4008
Cst_c23090	1	13.7	8.07123	Cst_c13010	1	49.2	10.8187
Cst_c23110	1	40.5	6.83065	Cst_c13020	1	65.3	12.4116
Cst_c23150	1	13.1	4.29683	Cst_c13030	1	50.8	12.0418
Cst_c23160	1	42.5	11.2181	Cst_c13040	1	67.6	13.5816
Cst_c23170	1	43.8	9.42158	Cst_c13060	1	52.3	8.62042
Cst_c23200	1	52.9	9.02694	Cst_c13070	1	41.5	8.73344
Cst_c23240	1	44.6	10.149	Cst_c13080	1	59.4	10.1012
Cst_c23250	1	47.9	10.173	Cst_c13100	1	56	9.82833
Cst_c23300	1	7.5	4.46243	Cst_c13110	1	34.3	14.5828
Cst_c23320	1	23.6	6.98258	Cst_c13120	1	52.7	12.3445
Cst_c23340	1	60.1	13.7411	Cst_c13130	1	32.1	8.12229
Cst_c23400	1	69.2	10.4114	Cst_c13140	1	47.7	9.06194
Cst_c23450	1	46.5	8.49904	Cst_c13160	1	65.3	11.2933
Cst_c23480	1	56.7	7.78235	Cst_c13180	1	68.2	13.422
Cst_c23530	1	22.8	7.07632	Cst_c13190	1	50.1	9.87857
Cst_c23550	1	71.6	8.94743	Cst_c13200	1	50	9.38257
Cst_c23580	1	56.2	11.1202	Cst_c13210	1	58.1	13.0714
Cst_c23590	1	55.5	10.7476	Cst_c13220	1	32.5	8.93212
Cst_c23600	1	38.8	8.69568	Cst_c13230	1	19.9	8.76538
Cst_c23620	1	45.1	8.94606	Cst_c13270	1	15.1	7.53397
Cst_c23660	1	35.8	8.32987	Cst_c13280	1	25.4	5.46204
Cst_c23670	1	56.6	8.99299	Cst_c13310	1	57	11.5294
Cst_c23680	1	39.1	8.11737	Cst_c13330	1	16.8	5.55494
Cst_c23710	1	65.8	8.63144	Cst_c13340	1	59.3	10.7602
Cst_c23770	1	9.7	3.62831	Cst_c13360	1	30.3	8.58713
Cst_c23780	1	14.5	4.90802	Cst_c13370	1	40.9	7.95056
Cst_c23790	1	30.2	5.81513	Cst_c13390	1	59.5	11.4021
Cst_c23800	1	6	2.9428	Cst_c13400	1	32.7	10.3514
Cst_c23820	1	73.9	7.55702	Cst_c13410	1	5	3.25293
Cst_c23870	1	88.3	15.7814	Cst_c13420	1	6.8	5.49516
Cst_c23880	1	84.4	15.6805	Cst_c13430	1	42.1	11.2441
Cst_c23910	1	35.8	8.58139	Cst_c13440	1	29.3	8.93007
Cst_c23930	1	48.7	10.436	Cst_c13460	1	3.3	6.22897
Cst_c23950	1	25.7	6.6341	Cst_c13470	1	34.2	7.87502
Cst_c23990	1	10.4	4.11549	Cst_c13480	1	7.8	6.2571
Cst_c24000	1	13.9	3.51594	Cst_c13490	1	81.6	12.4606
Cst_c24020	1	50.3	10.7702	Cst_c13500	1	21.9	6.98845
Cst_c24030	1	44.9	9.09535	Cst_c13510	1	13.8	6.25314
Cst_c24120	1	64.4	9.11676	Cst_c13520	1	13.2	10.6345
Cst_c24130	1	34	5.68952	Cst_c13530	1	59.7	12.2139
Cst_c24140	1	16.2	7.59171	Cst_c13600	1	11	4.92191
Cst_c24150	1	31.4	7.65732	Cst_c13630	1	6.3	3.0246
Cst_c24160	1	54.4	9.24175	Cst_c13640	1	15.2	6.16666
Cst_c24190	1	21.1	5.43212	Cst_c13660	1	18.3	6.76225
Cst_c24270	1	46.8	8.27549	Cst_c13670	1	14.1	6.13526
Cst_c24380	1	23	7.76377	Cst_c13680	1	62	14.3725
Cst_c24390	1	84.2	11.1245	Cst_c13690	1	46.4	11.5099
Cst_c24400	1	74.6	12.9519	Cst_c13700	1	81	15.8682
Cst_c24460	1	9.2	6.33286	Cst_c13710	1	60.1	14.8369
Cst_c24490	1	17	4.30342	Cst_c13720	1	40	9.86594
Cst_c24520	1	24.4	4.90098	Cst_c13730	1	40.8	10.8007
Cst_c24530	1	10.1	3.4742	Cst_c13750	1	50.6	11.6618
Cst_c24630	1	35.4	8.10451	Cst_c13760	1	33.8	8.66286
Cst_c24660	1	19.4	7.57554	Cst_c13770	1	62.6	10.9857
Cst_c24720	1	9.3	5.06194	Cst_c13780	1	65.8	12.1313
Cst_c24790	1	58.6	7.97614	Cst_c13790	1	47.6	11.5037
Cst_c24800	1	13.8	5.06361	Cst_c13800	1	48.1	9.63977
Cst_c24810	1	15.3	8.43966	Cst_c13810	1	37.7	10.0339
Cst_c24820	1	5.8	2.53613	Cst_c13820	1	59	9.73322
Cst_c24860	1	52.1	8.57795	Cst_c13830	1	60.1	11.1325
Cst_c24910	1	54.9	10.8263	Cst_c13840	1	50.6	10.7785
Cst_c24920	1	70.4	11.3415	Cst_c13850	1	26.6	10.5459
Cst_c24940	1	50.7	10.8088	Cst_c13860	1	20	9.85129
Cst_c24950	1	29.8	8.94011	Cst_c13870	1	45.6	11.0544
Cst_c24960	1	6	5.61803	Cst_c13880	1	7.9	5.95299
Cst_c24970	1	40.1	7.68738	Cst_c13910	1	56.5	11.8492
Cst_c24990	1	26.7	5.19278	Cst_c13930	1	12.3	5.25152
Cst_c25000	1	44.2	6.52419	Cst_c13940	1	38.6	8.44589
Cst_c25010	1	11.8	4.09159	Cst_c13950	1	20.3	9.63179
Cst_c25020	1	83.8	12.9111	Cst_c13960	1	23.7	7.71178
Cst_c25040	1	26.8	4.64052	Cst_c13970	1	21.8	6.86475
Cst_c25070	1	4.5	1.07027	Cst_c13980	1	53.4	14.6077
Cst_c25100	1	72.9	14.3337	Cst_c13990	1	92.1	14.6253
Cst_c25110	1	59.4	14.1052	Cst_c14000	1	75	13.1272
Cst_c25130	1	42.9	8.03509	Cst_c14020	1	27	9.5887
Cst_c25150	1	56.8	11.0299	Cst_c14060	1	62.3	12.3404
Cst_c25170	1	3.9	1.90835	Cst_c14090	1	48.6	10.6328
Cst_c25250	1	62.2	9.24318	Cst_c14100	1	35	8.33352
Cst_c25260	1	67.1	10.5228	Cst_c14110	1	31	7.86041
Cst_c25270	1	38.7	9.58736	Cst_c14120	1	30.7	7.68093
Cst_c25300	1	63.1	6.51242	Cst_c14130	1	33.8	9.16098
Cst_c25310	1	68.6	11.8987	Cst_c14140	1	54.4	9.24229
Cst_c25320	1	26.8	8.18515	Cst_c14150	1	55.6	9.5208
Cst_c25330	1	49.8	1.40608	Cst_c14160	1	51.4	11.4881
Cst_c25340	1	56.2	9.90203	Cst_c14170	1	55.1	11.3806
Cst_c25350	1	38.1	7.33196	Cst_c14180	1	13.2	8.23982
Cst_c25360	1	66.8	11.8344	Cst_c14200	1	6.6	6.63868
Cst_c25410	1	56.1	10.1756	Cst_c14210	1	44.4	9.81852
Cst_c25480	1	39.1	10.8187	Cst_c14220	1	29	9.78709
Cst_c25490	1	39.7	6.62248	Cst_c14230	1	43.8	8.08911
Cst_c25520	1	38	5.71093	Cst_c14250	1	44.8	10.5846
Cst_c25600	1	70.8	9.83994	Cst_c14260	1	28.7	10.9872
Cst_c25630	1	86.3	7.91199	Cst_c14270	1	44.5	9.71931
Cst_c25640	1	65.1	9.98425	Cst_c14280	1	74.5	10.2585
Cst_c25650	1	38.4	7.30701	Cst_c14290	1	24.3	8.50892
Cst_c25660	1	52.7	4.29887	Cst_c14300	1	26.1	7.18047
Cst_c25700	1	84.3	15.1568	Cst_c14310	1	3.4	6.94723
Cst_c25710	1	26.5	7.08245	Cst_c14320	1	49.6	11.0559
Cst_c25730	1	7	4.23213	Cst_c14330	1	8	5.60253
Cst_c25740	1	79.1	12.3545	Cst_c14410	1	29.7	5.76301
Cst_c25760	1	11	3.94581	Cst_c14420	1	48.7	7.84675
Cst_c25780	1	84.7	13.8328	Cst_c14430	1	48.6	9.65897
Cst_c25790	1	57.1	6.38064	Cst_c14440	1	73.1	12.2431
Cst_c25800	1	85.3	15.7331	Cst_c14450	1	12.6	7.74026
Cst_c25820	1	41.2	8.80197	Cst_c14460	1	68	14.0106
Cst_c25830	1	65.7	13.1306	Cst_c14490	1	10.8	4.23059
Cst_c25840	1	65.2	12.4053	Cst_c14500	1	34.6	10.6081
Cst_c25850	1	71.5	11.275	Cst_c14530	1	12.7	6.23653
Cst_c25900	1	7.6	1.96304	Cst_c14560	1	33.7	11.8315
Cst_c25930	1	52.7	9.46622	Cst_c14570	1	80.9	14.8875
Cst_c25990	1	5.1	3.59675	Cst_c14580	1	73.3	13.5829
Cst_c26000	1	64.9	11.2242	Cst_c14590	1	51.6	10.327
Cst_c26060	1	15.9	3.62005	Cst_c14600	1	13.8	4.21075
Cst_c26070	1	81.4	16.3431	Cst_c14610	1	26.7	7.71671
Cst_c26080	1	47.1	13.4189	Cst_c14620	1	61.7	12.9079
Cst_c26140	1	18.8	5.93375	Cst_c14630	1	18.5	7.95833
Cst_c26150	1	45.9	8.19913	Cst_c14640	1	59.5	12.4267
Cst_c26160	1	22.6	4.82604	Cst_c14650	1	86.6	12.6232
Cst_c26170	1	27.5	7.44701	Cst_c14660	1	78.6	11.4301
Cst_c26180	1	23.8	4.39923	Cst_c14680	1	52.5	10.8894
Cst_c26200	1	24.3	9.50378	Cst_c14690	1	27.7	8.69228
Cst_c26230	1	55.2	8.66503	Cst_c14700	1	62.5	12.0008
Cst_c26240	1	63.3	10.5464	Cst_c14720	1	65	12.0905
Cst_c26270	1	49.2	7.55061	Cst_c14730	1	56.8	9.20412
Cst_c26280	1	55.4	8.65209	Cst_c14740	1	30.5	7.40597
Cst_c26290	1	19.7	6.37645	Cst_c14750	1	56.7	12.3687
Cst_c26300	1	41.7	5.54123	Cst_c14760	1	49.3	9.67892
Cst_c26310 Cst_c02670	2	36.4	4.40638	Cst_c14770	1	37.7	10.6462
Cst_c26330	1	68.7	6.72108	Cst_c14780	1	27.1	9.36975
Cst_c26340	1	21.8	11.0819	Cst_c14790	1	58	9.96468
Cst_c26350	1	45.1	4.60441	Cst_c14800	1	30.1	7.62221
Cst_c26360	1	21.2	7.0971	Cst_c14810	1	70.5	12.4957
Cst_c26370	1	39.4	5.85269	Cst_c14820	1	54.1	12.5796
Cst_c26380	1	25	5.09194	Cst_c14830	1	34.7	10.5591
Cst_c26390	1	20.5	5.90653	Cst_c14880	1	39.4	9.99196
Cst_c26400	1	19	5.0398	Cst_c14890	1	72.8	13.2414
Cst_c26410	1	35.5	6.00553	Cst_c14900	1	45.3	12.0229
Cst_c26430	1	29.9	6.60308	Cst_c14910	1	35.3	8.66353
Cst_c26440	1	32.7	6.34059	Cst_c14920	1	67	12.2058
Cst_c26450	1	70.5	6.54771	Cst_c14930	1	18.8	7.25434
Cst_c26460	1	40.8	5.58689	Cst_c14940	1	75.9	15.0041
Cst_c26500	1	67.4	10.6208	Cst_c14950	1	56.9	11.0888
Cst_c26520	1	94.1	16.0598	Cst_c14960	1	18.8	7.22184
Cst_c26570	1	73.5	12.128	Cst_c14970	1	30.6	10.6367
Cst_c26580	1	16	3.23168	Cst_c14980	1	41.5	11.0697
Cst_c26590	1	59.6	10.742	Cst_c14990	1	13.8	7.39787
Cst_c26610	1	33.2	7.16341	Cst_c15000	1	20	8.59429
Cst_c26630	1	93.5	13.8769	Cst_c15010	1	79	11.513
Cst_c26640	1	79.8	12.3599	Cst_c15020	1	50.6	10.1211
Cst_c26650	1	46.2	5.73533	Cst_c15030	1	43.6	9.76767
Cst_c26660	1	30.7	6.60189	Cst_c15080	1	12.5	5.57346
Cst_c26700	1	56.6	9.32565	Cst_c15090	1	68.6	13.6078
Cst_c26710	1	85.6	6.81665	Cst_c15100	1	44.8	10.2782
Cst_c26720	1	8.2	4.45291	Cst_c15110	1	68.8	10.6632
Cst_c26790	1	24.5	8.17971	Cst_c15120	1	47.5	10.7328
Cst_c26810	1	68	9.72165	Cst_c15140	1	18.6	5.21617
Cst_c26830	1	77.7	10.8857	Cst_c15150	1	67.5	9.91819
Cst_c26840	1	24.6	7.60506	Cst_c15160	1	49.3	10.5309
Cst_c26870	1	40.7	6.13307	Cst_c15170	1	32.7	8.24046
Cst_c26880	1	28.4	6.82294	Cst_c15230	1	24.3	8.10966
Cst_c26910	1	39.2	8.71406	Cst_c15240	1	34.6	9.22262
Cst_c26920	1	5.2	2.17752	Cst_c15250	1	47.5	9.76359
Cst_c26970	1	36.8	7.09186	Cst_c15270	1	55.7	9.01073
Cst_c26980	1	39.8	5.61021	Cst_c15280	1	73.9	13.5852
Cst_c27000	1	68.6	6.99248	Cst_c15290	1	78.7	13.8452
Cst_c27020	1	4.7	2.51058	Cst_c15300	1	39.5	11.0883
Cst_c27050	1	10.3	4.9469	Cst_c15310	1	34.5	8.86348
Cst_c27090	1	62.8	12.9836	Cst_c15320	1	67.8	11.7487
Cst_c27160	1	43.1	5.322	Cst_c15330	1	16.8	6.0712
Cst_c27170	1	21.4	5.88623	Cst_c15340	1	12	6.60206
Cst_c27190	1	70.3	10.297	Cst_c15350	1	20.2	6.5454
Cst_c27200	1	51.7	10.8989	Cst_c15360	1	66.2	12.5423
Cst_c27240	1	37.4	2.12774	Cst_c15370	1	39.7	8.68605
Cst_c27250	1	71.8	12.1629	Cst_c15400	1	42.3	9.27646
Cst_c27260	1	81.2	10.3887	Cst_c15410	1	55.1	12.6724
Cst_c27320	1	56.4	9.53491	Cst_c15420	1	7.3	3.42934
Cst_c27360	1	10.4	6.92339	Cst_c15430	1	29.8	8.89532
Cst_c27370	1	14	2.94979	Cst_c15490	1	68.3	13.6275
Cst_c27400	1	36.3	8.87066	Cst_c15500	1	30.1	7.24829
Cst_c27520	1	20.2	4.72496	Cst_c15510	1	10.5	5.63995
Cst_c27530	1	8.8	2.58263	Cst_c15520	1	68.9	12.168
Cst_c27550	1	25.2	6.7431	Cst_c15550	1	3.8	3.30667
Cst_c27580	1	24.4	4.61425	Cst_c15570	1	36.8	10.1959
Cst_c27600	1	59	10.8298	Cst_c15580	1	5.8	8.1794
Cst_c27610	1	61.9	14.9826	Cst_c15590	1	85	12.6939
Cst_c27620	1	3.5	3.60552	Cst_c15600	1	75.7	12.992
Cst_c27630	1	39	5.7317	Cst_c15610	1	24.7	7.16722
Cst_c27640	1	13.8	4.7861	Cst_c15620	1	13.6	11.3384
Cst_c27650	1	64.8	12.4832	Cst_c15630	1	89.3	12.9054
Cst_c27770	1	2.2	3.02385	Cst_c15640	1	24.8	11.0365
Cst_c27780	1	15.6	2.02583	Cst_c15680	1	11	4.53537
				Cst_c15780	1	53.1	9.94582
				Cst_c15800	1	60.8	9.29407
				Cst_c15820	1	4.7	4.42466
				Cst_c15830	1	67.5	11.5438
				Cst_c15840	1	35.7	7.87024
				Cst_c15850	1	42.1	10.2596
				Cst_c15860	1	41.3	10.6815
				Cst_c15870	1	70.8	10.762
				Cst_c15880	1	57.6	11.6353
				Cst_c15890	1	77.6	15.3553
				Cst_c15900	1	49.7	10.788
				Cst_c15910	1	5.6	5.37394
				Cst_c15920	1	18.2	9.32822
				Cst_c15930	1	24.8	8.17062
				Cst_c15960	1	45.6	12.3337
				Cst_c15970	1	15.4	7.34939
				Cst_c15980	1	7.7	4.83822
				Cst_c15990	1	17.2	5.43601
				Cst_c16000	1	51.2	11.2017
				Cst_c16020	1	16.5	5.53589
				Cst_c16050	1	2.3	4.23845
				Cst_c16080	1	32.7	8.17929
				Cst_c16090	1	75.2	12.2885
				Cst_c16140	1	43.8	9.65683
				Cst_c16150	1	31.6	8.68005
				Cst_c16160	1	53.9	10.2196
				Cst_c16170	1	59.5	12.3573
				Cst_c16190	1	50.7	12.0057
				Cst_c16200	1	39.9	9.92226
				Cst_c16210	1	14.5	5.74271
				Cst_c16220	1	19.3	9.2552
				Cst_c16230	1	39.8	10.2168
				Cst_c16270	1	26.3	7.8548
				Cst_c16280	1	46.9	9.5856
				Cst_c16290	1	24.1	7.61827
				Cst_c16300	1	81.4	12.3172
				Cst_c16310	1	33.8	7.68489
				Cst_c16320	1	7.1	6.97677
				Cst_c16330	1	42.7	9.04205
				Cst_c16370	1	39	10.0351
				Cst_c16380	1	10.6	6.25984
				Cst_c16390	1	23.6	7.6611
				Cst_c16400	1	13.2	10.1179
				Cst_c16410	1	54.7	10.5514
				Cst_c16420	1	23.2	7.75394
				Cst_c16440	1	21.2	4.2515
				Cst_c16450	1	17	5.67851
				Cst_c16480	1	53	9.92034
				Cst_c16510	1	23.3	7.93207
				Cst_c16530	1	43.3	9.15206
				Cst_c16540	1	60.8	11.8297
				Cst_c16550	1	72.9	13.946
				Cst_c16560	1	61.7	12.9607
				Cst_c16570	1	63.4	12.1139
				Cst_c16590	1	77.5	11.1622
				Cst_c16600	1	16.8	9.11792
				Cst_c16630	1	50	9.90751
				Cst_c16640	1	14.3	4.71593
				Cst_c16650	1	15.6	8.36868
				Cst_c16670	1	44.7	12.3738
				Cst_c16680	1	64.8	10.3923
				Cst_c16690	1	35	7.27256
				Cst_c16700	1	46.2	10.5101
				Cst_c16710	1	39.8	8.24668
				Cst_c16720	1	26.8	7.82886
				Cst_c16730	1	42.4	9.28159
				Cst_c16750	1	82	13.6422
				Cst_c16780	1	25.3	8.57231
				Cst_c16800	1	20.2	5.31612
				Cst_c16810	1	12	5.6465
				Cst_c16820	1	2.8	3.05661
				Cst_c16830	1	14.3	4.915
				Cst_c16850	1	38.5	8.44224
				Cst_c16860	1	56.4	13.1674
				Cst_c16870	1	53.6	10.1919
				Cst_c16880	1	37.7	9.09173
				Cst_c16890 Cst_c11370	2	71.9	13.6992
				Cst_c16900	1	65.3	11.7743
				Cst_c16910	1	21.2	11.1541
				Cst_c16930	1	44.9	10.0231
				Cst_c16940	1	17.1	4.67116
				Cst_c16960	1	84.4	14.5712
				Cst_c16970	1	10.5	6.2125
				Cst_c16980	1	5.7	7.78404
				Cst_c16990	1	22.5	7.09923
				Cst_c17010	1	26.2	10.189
				Cst_c17030	1	23.7	10.0534
				Cst_c17040	1	66.7	12.7003
				Cst_c17060	1	37.4	8.4078
				Cst_c17100	1	7.6	5.4585
				Cst_c17120	1	60.5	11.6608
				Cst_c17130	1	62.7	12.3908
				Cst_c17170	1	28.4	8.65319
				Cst_c17180	1	20.7	4.20573
				Cst_c17220	1	10.2	5.46814
				Cst_c17230	1	65	9.9361
				Cst_c17240	1	41.4	12.1963
				Cst_c17250	1	36.3	9.06729
				Cst_c17270	1	46.6	10.1832
				Cst_c17280	1	63.4	10.4653
				Cst_c17290	1	71.8	14.4385
				Cst_c17300	1	67.8	9.92512
				Cst_c17310	1	49.1	10.0875
				Cst_c17320	1	14	6.87913
				Cst_c17350	1	32.9	8.26577
				Cst_c17370	1	14.7	7.22576
				Cst_c17380	1	55.3	13.2908
				Cst_c17390	1	16.8	7.47952
				Cst_c17420	1	47.1	11.6354
				Cst_c17430	1	27.2	9.54656
				Cst_c17440	1	34.3	8.4562
				Cst_c17460	1	25.2	7.90217
				Cst_c17480	1	49.3	8.68496
				Cst_c17490	1	7.9	5.79488
				Cst_c17510	1	72.9	12.2402
				Cst_c17520	1	42	9.19163
				Cst_c17540	1	34.8	7.43032
				Cst_c17550	1	1.6	4.69343
				Cst_c17560	1	8.1	5.27179
				Cst_c17660	1	31.3	7.66918
				Cst_c17720	1	5.5	3.64633
				Cst_c17730	1	14	7.51494
				Cst_c17760	1	32.3	8.34023
				Cst_c17770	1	9	5.24814
				Cst_c17780	1	46.2	9.80449
				Cst_c17800	1	79.4	10.4561
				Cst_c17850	1	9.7	4.32104
				Cst_c17860	1	62.7	10.3978
				Cst_c17940	1	62.7	13.0254
				Cst_c17960	1	23	7.79705
				Cst_c17970	1	48.4	12.0202
				Cst_c17980	1	39.6	9.57869
				Cst_c17990	1	42.3	9.63503
				Cst_c18000	1	23.1	7.5303
				Cst_c18060	1	11	5.41232
				Cst_c18120	1	31.5	8.52773
				Cst_c18130	1	44.7	9.65957
				Cst_c18140	1	31.6	8.96969
				Cst_c18150	1	51.1	11.2208
				Cst_c18180	1	59.5	11.6392
				Cst_c18230	1	46.7	8.47101
				Cst_c18240	1	3.5	6.35984
				Cst_c18250	1	54.9	10.3193
				Cst_c18300	1	54.6	9.73439
				Cst_c18310	1	55.4	12.4462
				Cst_c18330	1	15.9	4.20253
				Cst_c18350	1	10.9	4.62421
				Cst_c18360	1	12.3	4.71801
				Cst_c18380	1	72.7	15.4028
				Cst_c18390	1	75.1	16.5155
				Cst_c18400	1	74.3	14.566
				Cst_c18410	1	91.6	15.6211
				Cst_c18420	1	97.1	16.0629
				Cst_c18450	1	34.7	8.21256
				Cst_c18460	1	57.7	12.9361
				Cst_c18490	1	37.3	9.93365
				Cst_c18500	1	9.4	5.31001
				Cst_c18510	1	22.6	7.57545
				Cst_c18540	1	35.7	8.3734
				Cst_c18630	1	6.9	3.21992
				Cst_c18640	1	54.7	9.39621
				Cst_c18650	1	38.7	11.27
				Cst_c18710	1	46.1	9.19308
				Cst_c18730	1	15.6	7.20963
				Cst_c18750	1	43.9	9.44064
				Cst_c18760	1	38	9.43563
				Cst_c18770	1	29.5	9.91091
				Cst_c18780	1	70.5	12.9992
				Cst_c18790	1	60	10.2773
				Cst_c18800	1	56.3	11.7028
				Cst_c18810	1	86.7	13.3546
				Cst_c18820	1	90	13.716
				Cst_c18830	1	69.9	13.6033
				Cst_c18840	1	88.3	16.4498
				Cst_c18850	1	58.7	10.7581
				Cst_c18860	1	38.2	9.85487
				Cst_c18870	1	7.8	7.55125
				Cst_c18890	1	45.5	10.7601
				Cst_c18910	1	32.2	7.90777
				Cst_c18920	1	38.1	11.4008
				Cst_c18930	1	40.3	8.43361
				Cst_c18940	1	4.5	3.15555
				Cst_c18960	1	10.5	4.94708
				Cst_c18970	1	13.2	7.57347
				Cst_c18980	1	16.5	7.75321
				Cst_c18990	1	34.6	8.53143
				Cst_c19000	1	48.8	10.6692
				Cst_c19010	1	33.9	8.49556
				Cst_c19030	1	5.7	6.13986
				Cst_c19060	1	24.4	5.28693
				Cst_c19070	1	11.9	6.59858
				Cst_c19080	1	17.8	5.6437
				Cst_c19090	1	48.1	9.66086
				Cst_c19110	1	47.2	8.49024
				Cst_c19160	1	11.4	5.94646
				Cst_c19170	1	76.2	11.1826
				Cst_c19180	1	47.7	9.98521
				Cst_c19190	1	30.9	6.73638
				Cst_c19200	1	54.4	11.1608
				Cst_c19300	1	31.7	7.90336
				Cst_c19350	1	7	4.34202
				Cst_c19360	1	43.6	9.3251
				Cst_c19370	1	5.5	6.55112
				Cst_c19380	1	28.6	8.61907
				Cst_c19400	1	13	7.54085
				Cst_c19430	1	37.9	8.34241
				Cst_c19440	1	66	10.0048
				Cst_c19470	1	22.9	7.31064
				Cst_c19540	1	36.1	8.21561
				Cst_c19580	1	46	9.45782
				Cst_c19600	1	55.8	12.2917
				Cst_c19610	1	23.8	8.14889
				Cst_c19640	1	16.9	5.97908
				Cst_c19650	1	12.8	5.55203
				Cst_c19670	1	59.3	13.1929
				Cst_c19700	1	52.2	12.432
				Cst_c19730	1	30.5	9.63207
				Cst_c19740	1	90.3	12.7198
				Cst_c19750	1	61.5	11.217
				Cst_c19760	1	46.2	8.08433
				Cst_c19770	1	36.1	9.60797
				Cst_c19780	1	11.7	6.43886
				Cst_c19850	1	27.5	7.86308
				Cst_c19870	1	2.6	7.59907
				Cst_c19880	1	8.9	4.14771
				Cst_c19900	1	45.6	13.4101
				Cst_c19910	1	68	12.6965
				Cst_c19960	1	22.2	9.85174
				Cst_c20000	1	57.1	13.2536
				Cst_c20010	1	7.8	8.48284
				Cst_c20020	1	76.2	10.3042
				Cst_c20030	1	6.9	10.3615
				Cst_c20040	1	62.5	10.7407
				Cst_c20050	1	70.3	12.4319
				Cst_c20060	1	90.1	17.144
				Cst_c20070	1	59.5	14.6114
				Cst_c20080	1	75.3	15.4417
				Cst_c20090	1	59.6	14.2436
				Cst_c20100	1	76.6	12.6941
				Cst_c20120	1	73.5	15.5201
				Cst_c20130	1	28	7.57764
				Cst_c20140	1	35	9.87339
				Cst_c20160	1	30.7	6.66808
				Cst_c20170	1	39.9	9.54547
				Cst_c20180	1	41.8	9.10808
				Cst_c20190	1	49.2	10.3469
				Cst_c20210	1	81	14.9075
				Cst_c20220	1	69.3	13.2431
				Cst_c20230	1	43.7	9.1941
				Cst_c20240	1	91.5	13.3892
				Cst_c20250	1	76.4	10.8721
				Cst_c20260	1	65.9	11.2284
				Cst_c20270	1	24.9	7.76637
				Cst_c20280	1	41.5	9.83602
				Cst_c20290	1	43.8	9.69157
				Cst_c20300	1	87.1	14.0822
				Cst_c20310	1	73.9	13.5233
				Cst_c20320	1	29.4	8.34338
				Cst_c20330	1	18.9	7.63931
				Cst_c20340	1	56.9	10.7572
				Cst_c20370	1	38.5	9.92717
				Cst_c20380	1	67.7	11.8612
				Cst_c20400	1	23.4	7.86268
				Cst_c20410	1	4.9	4.61671
				Cst_c20430	1	59.9	11.3444
				Cst_c20450	1	61.8	11.5692
				Cst_c20460	1	40.3	9.21889
				Cst_c20500	1	55.8	10.7974
				Cst_c20510	1	22.7	10.1537
				Cst_c20550	1	16.3	7.67896
				Cst_c20560	1	12.4	5.35447
				Cst_c20570	1	60.5	11.2001
				Cst_c20590	1	30.8	8.64089
				Cst_c20600	1	27	8.5015
				Cst_c20610	1	44.8	8.51696
				Cst_c20620	1	20.7	6.14712
				Cst_c20630	1	58.7	11.2362
				Cst_c20640	1	33.2	9.90331
				Cst_c20650	1	48.3	8.53091
				Cst_c20660	1	42.3	9.37237
				Cst_c20670	1	20	7.78325
				Cst_c20690	1	42.9	8.49173
				Cst_c20700	1	26.2	7.9084
				Cst_c20710	1	47.7	10.4283
				Cst_c20720	1	37.9	7.85775
				Cst_c20730	1	72.4	14.7089
				Cst_c20740	1	32.9	10.1358
				Cst_c20760	1	12.3	14.2919
				Cst_c20770	1	37.9	8.30903
				Cst_c20780	1	71.8	14.2269
				Cst_c20790	1	88.8	15.2286
				Cst_c20800	1	91.8	16.128
				Cst_c20810	1	94	16.6272
				Cst_c20820	1	26	7.5403
				Cst_c20830	1	14.5	8.61699
				Cst_c20840	1	39.9	8.24624
				Cst_c20860	1	36.7	11.2525
				Cst_c20890	1	19.3	7.71113
				Cst_c20900	1	43	8.1209
				Cst_c20940	1	9.3	2.94322
				Cst_c20950	1	23.9	7.08288
				Cst_c20960	1	42.9	8.14935
				Cst_c20980	1	46.8	10.1681
				Cst_c20990	1	50.8	9.28116
				Cst_c21000	1	30.3	6.92034
				Cst_c21030	1	33.4	12.077
				Cst_c21040	1	54	12.3559
				Cst_c21050	1	64.8	11.5893
				Cst_c21080	1	74.6	13.8623
				Cst_c21090	1	60.8	12.1462
				Cst_c21100	1	57.3	10.3459
				Cst_c21120	1	57.1	10.5246
				Cst_c21130	1	35.5	10.0721
				Cst_c21140	1	50.7	11.7717
				Cst_c21160	1	48.5	10.141
				Cst_c21170	1	19	7.9756
				Cst_c21180	1	48.6	11.7268
				Cst_c21210	1	49.6	11.6437
				Cst_c21220	1	79.7	12.9732
				Cst_c21230	1	67	10.3516
				Cst_c21240	1	43.3	11.9288
				Cst_c21250	1	40.9	12.2899
				Cst_c21260	1	26.9	7.62091
				Cst_c21270	1	50.1	11.9409
				Cst_c21280	1	13.4	5.90028
				Cst_c21290	1	77.3	11.0519
				Cst_c21350	1	25.1	9.45358
				Cst_c21360	1	46.7	11.1388
				Cst_c21490	1	86.5	15.4097
				Cst_c21500	1	57.1	9.58098
				Cst_c21510	1	55.3	9.86008
				Cst_c21520	1	84.2	16.7035
				Cst_c21630	1	41.1	10.8124
				Cst_c21640	1	35.4	9.94687
				Cst_c21660	1	54.1	13.5446
				Cst_c21680	1	74.2	13.4576
				Cst_c21700	1	14.8	7.40808
				Cst_c21710	1	27.6	7.11252
				Cst_c21720	1	32	7.35521
				Cst_c21730	1	35.1	9.9274
				Cst_c21740	1	66	13.3878
				Cst_c21800	1	3.4	9.06758
				Cst_c21810	1	61.2	10.9702
				Cst_c21820	1	82.2	12.5378
				Cst_c21830	1	39.2	9.19274
				Cst_c21840	1	7.4	4.91968
				Cst_c21860	1	50.3	12.8746
				Cst_c21870	1	8.8	7.16
				Cst_c21880	1	8.3	9.20932
				Cst_c21890	1	48	10.8982
				Cst_c21900	1	41.3	10.6235
				Cst_c21930	1	65.8	12.4527
				Cst_c21960	1	67.5	13.3757
				Cst_c21970	1	25.3	6.91681
				Cst_c21980	1	55	11.2393
				Cst_c21990	1	54.2	13.1928
				Cst_c22020	1	72.7	11.8333
				Cst_c22050	1	66.9	12.3179
				Cst_c22060	1	2.9	5.57696
				Cst_c22070	1	28	8.02551
				Cst_c22080	1	48.1	12.254
				Cst_c22100	1	65.8	13.3144
				Cst_c22110	1	55.2	16.1891
				Cst_c22170	1	21.9	6.25882
				Cst_c22180	1	38.3	9.03918
				Cst_c22210	1	21.7	5.35144
				Cst_c22220	1	18	9.59111
				Cst_c22230	1	14	5.18997
				Cst_c22240	1	13.3	4.33796
				Cst_c22250	1	67.4	13.4465
				Cst_c22270	1	13.4	4.99965
				Cst_c22280	1	52.9	12.4044
				Cst_c22300	1	44.4	15.3463
				Cst_c22310	1	30.1	9.88847
				Cst_c22320	1	20.7	9.82667
				Cst_c22330	1	46.3	10.7326
				Cst_c22340	1	80.6	13.2714
				Cst_c22370	1	44.3	8.98011
				Cst_c22410	1	79.7	11.1716
				Cst_c22420	1	40.5	9.09043
				Cst_c22430	1	20.2	9.79378
				Cst_c22440	1	36.2	11.3315
				Cst_c22450	1	28.2	10.0727
				Cst_c22460	1	21.5	7.78937
				Cst_c22470	1	31.8	8.36638
				Cst_c22480	1	19.2	9.34822
				Cst_c22490	1	34.9	9.33393
				Cst_c22500	1	70.1	10.2812
				Cst_c22510	1	23.6	7.77276
				Cst_c22520	1	46	10.4199
				Cst_c22550	1	28.7	12.048
				Cst_c22560	1	33	12.6858
				Cst_c22570	1	5.4	3.96246
				Cst_c22580	1	86.7	14.3087
				Cst_c22590	1	84.7	14.7226
				Cst_c22600	1	59.7	13.0323
				Cst_c22610	1	25	9.84275
				Cst_c22620	1	20.9	6.17864
				Cst_c22630	1	22	7.22604
				Cst_c22640	1	81.3	12.5782
				Cst_c22660	1	12.7	4.08173
				Cst_c22670	1	31.8	9.97653
				Cst_c22680	1	31.7	11.4048
				Cst_c22690	1	36.6	9.53108
				Cst_c22710	1	24.2	7.76593
				Cst_c22720	1	29	8.86244
				Cst_c22730	1	29.4	7.68698
				Cst_c22740	1	12.4	5.81668
				Cst_c22750	1	30.8	10.7122
				Cst_c22780	1	16.3	7.03763
				Cst_c22800	1	89	14.7797
				Cst_c22810	1	90.5	14.3804
				Cst_c22820	1	5.4	5.78842
				Cst_c22840	1	78.8	14.0982
				Cst_c22850	1	44.8	10.4988
				Cst_c22860	1	69.5	11.5794
				Cst_c22870	1	22	8.64447
				Cst_c22880	1	5.5	3.4187
				Cst_c22890	1	64.8	10.3484
				Cst_c22900	1	70	10.9409
				Cst_c22910	1	48.2	11.2592
				Cst_c22920	1	8.3	6.89008
				Cst_c22930	1	52.3	10.7559
				Cst_c22940	1	28.8	10.4468
				Cst_c22950	1	26.5	7.08582
				Cst_c22960	1	48.7	9.54367
				Cst_c22970	1	15.9	6.63706
				Cst_c22980	1	41.6	9.76356
				Cst_c22990	1	33.6	8.9853
				Cst_c23000	1	62.5	12.8315
				Cst_c23010	1	24.8	8.99904
				Cst_c23020	1	58.7	10.7081
				Cst_c23040	1	85	13.0318
				Cst_c23050	1	84.3	12.0852
				Cst_c23070	1	56.2	12.7366
				Cst_c23090	1	23.5	8.81982
				Cst_c23100	1	11.4	7.94294
				Cst_c23110	1	50.6	10.0092
				Cst_c23120	1	27	6.73973
				Cst_c23140	1	27.5	6.69062
				Cst_c23150	1	31.6	7.95317
				Cst_c23160	1	75.4	13.8505
				Cst_c23170	1	31.5	8.52572
				Cst_c23180	1	44.4	9.48068
				Cst_c23190	1	4.5	8.498
				Cst_c23200	1	59.9	9.983
				Cst_c23240	1	44.6	10.5646
				Cst_c23250	1	55.9	11.2759
				Cst_c23280	1	22.1	6.57055
				Cst_c23300	1	59.6	10.7401
				Cst_c23320	1	65.5	11.2227
				Cst_c23380	1	27.6	7.74354
				Cst_c23390	1	31.3	8.43628
				Cst_c23400	1	86.8	14.2486
				Cst_c23410	1	61.7	12.8299
				Cst_c23450	1	57.5	10.988
				Cst_c23480	1	56.2	10.0754
				Cst_c23490	1	14.7	5.71695
				Cst_c23510	1	47.1	8.76672
				Cst_c23520	1	43.3	9.01362
				Cst_c23530	1	54.4	10.2204
				Cst_c23540	1	44.8	9.13462
				Cst_c23550	1	83.3	11.6642
				Cst_c23560	1	40.8	10.3346
				Cst_c23580	1	7.2	4.74716
				Cst_c23590	1	61.7	12.7189
				Cst_c23600	1	45.3	11.6826
				Cst_c23610	1	35.4	9.13887
				Cst_c23620	1	75.7	12.5195
				Cst_c23630	1	28.3	9.87259
				Cst_c23640	1	33.2	8.61142
				Cst_c23650	1	13.9	9.12635
				Cst_c23660	1	24.3	6.7671
				Cst_c23670	1	60	10.9146
				Cst_c23680	1	47.5	11.097
				Cst_c23690	1	11.8	7.52898
				Cst_c23710	1	62.5	11.122
				Cst_c23720	1	35.3	6.75016
				Cst_c23730	1	43.2	6.13654
				Cst_c23750	1	62.8	12.3532
				Cst_c23760	1	42.2	9.85229
				Cst_c23770	1	26.3	8.48344
				Cst_c23780	1	57.2	12.0779
				Cst_c23790	1	45.5	13.245
				Cst_c23800	1	22.7	7.0166
				Cst_c23820	1	73.9	13.6935
				Cst_c23850	1	40	13.4084
				Cst_c23860	1	6.3	6.40407
				Cst_c23870	1	58.9	10.6935
				Cst_c23880	1	52.4	10.3503
				Cst_c23900	1	49.1	7.17029
				Cst_c23910	1	46.9	9.94871
				Cst_c23930	1	62.1	13.7102
				Cst_c23950	1	43.8	10.7897
				Cst_c23960	1	23.6	7.36806
				Cst_c23970	1	15.2	7.96927
				Cst_c24000	1	58.7	10.8299
				Cst_c24010	1	25.4	10.0541
				Cst_c24020	1	44.3	9.94762
				Cst_c24030	1	52.5	11.2429
				Cst_c24080	1	49.7	9.49778
				Cst_c24100	1	18.9	6.23916
				Cst_c24110	1	36	8.52887
				Cst_c24120	1	71.2	11.9714
				Cst_c24130	1	53.8	11.0562
				Cst_c24140	1	55	11.9571
				Cst_c24150	1	47.2	11.7913
				Cst_c24160	1	55.7	13.5807
				Cst_c24180	1	7.6	5.45151
				Cst_c24190	1	51.1	10.7753
				Cst_c24210	1	31.5	6.39823
				Cst_c24230	1	38.5	10.007
				Cst_c24240	1	15.8	7.25658
				Cst_c24270	1	12.6	5.93781
				Cst_c24280	1	6.5	6.59127
				Cst_c24290	1	61.6	10.0285
				Cst_c24300	1	18.5	7.35286
				Cst_c24350	1	67.4	11.3471
				Cst_c24360	1	35.6	7.67861
				Cst_c24380	1	29.9	9.76275
				Cst_c24390	1	84.2	12.2855
				Cst_c24410	1	70.6	11.3305
				Cst_c24430	1	32	8.09741
				Cst_c24440	1	9.2	6.79583
				Cst_c24450	1	7.9	6.86459
				Cst_c24460	1	49.7	12.953
				Cst_c24470	1	64.5	11.0598
				Cst_c24480	1	19.1	10.0418
				Cst_c24490	1	63.1	11.8636
				Cst_c24510	1	46.3	8.68558
				Cst_c24520	1	65	11.1228
				Cst_c24530	1	63.8	11.446
				Cst_c24540	1	64.7	13.1762
				Cst_c24550	1	52	9.20326
				Cst_c24570	1	28.9	10.6677
				Cst_c24580	1	66.4	10.4716
				Cst_c24590	1	55.3	11.32
				Cst_c24600	1	20.8	7.53334
				Cst_c24610	1	24.2	9.79246
				Cst_c24620	1	26.3	11.7227
				Cst_c24630	1	41.6	10.8356
				Cst_c24660	1	26.3	6.84651
				Cst_c24680	1	49.7	9.30545
				Cst_c24690	1	18.7	7.91812
				Cst_c24700	1	26.9	8.08684
				Cst_c24720	1	32.3	7.86599
				Cst_c24730	1	18.7	11.9484
				Cst_c24780	1	44.4	10.2074
				Cst_c24790	1	67.8	12.2118
				Cst_c24800	1	42.1	9.80139
				Cst_c24810	1	36.4	10.8627
				Cst_c24820	1	35.7	8.11114
				Cst_c24840	1	15.7	5.75713
				Cst_c24860	1	59.2	13.1837
				Cst_c24870	1	42.5	8.90485
				Cst_c24880	1	33.9	8.97942
				Cst_c24900	1	55	11.882
				Cst_c24910	1	78.2	13.8644
				Cst_c24920	1	75.2	14.5782
				Cst_c24940	1	15.3	6.75671
				Cst_c24950	1	52.8	11.1536
				Cst_c24960	1	22.4	9.7087
				Cst_c24970	1	63.7	11.9238
				Cst_c24980	1	43.6	9.13984
				Cst_c24990	1	48.2	10.4147
				Cst_c25000	1	84.3	13.1573
				Cst_c25010	1	62.7	12.162
				Cst_c25020	1	95.2	16.8512
				Cst_c25040	1	36.6	9.15766
				Cst_c25050	1	13.8	4.83986
				Cst_c25070	1	53.1	10.8086
				Cst_c25080	1	53.3	9.4986
				Cst_c25090	1	6.7	6.35926
				Cst_c25100	1	42.2	10.2544
				Cst_c25110	1	63.4	13.9459
				Cst_c25130	1	40.9	9.02503
				Cst_c25140	1	46.9	9.22746
				Cst_c25150	1	56.8	14.8088
				Cst_c25170	1	22.4	7.08052
				Cst_c25190	1	21.8	6.31147
				Cst_c25200	1	36	6.91544
				Cst_c25250	1	83	10.5607
				Cst_c25260	1	77.8	12.4335
				Cst_c25270	1	54.9	11.617
				Cst_c25290	1	14.4	8.79894
				Cst_c25300	1	75	13.3695
				Cst_c25310	1	71.8	13.3156
				Cst_c25320	1	26.8	10.1406
				Cst_c25330	1	87.3	10.9013
				Cst_c25340	1	59.5	12.7792
				Cst_c25350	1	57.1	9.83452
				Cst_c25360	1	85.6	13.2958
				Cst_c25410	1	29.3	7.80802
				Cst_c25420	1	13.5	7.31092
				Cst_c25460	1	29	9.73195
				Cst_c25470	1	50.3	11.2472
				Cst_c25480	1	49.5	11.5148
				Cst_c25490	1	63	10.4935
				Cst_c25520	1	47.1	9.48725
				Cst_c25600	1	76.8	11.2618
				Cst_c25610	1	8.6	4.96394
				Cst_c25620	1	32.1	8.03398
				Cst_c25630	1	70.3	12.3594
				Cst_c25640	1	65.1	12.2309
				Cst_c25650	1	38.4	11.5534
				Cst_c25660	1	71.3	10.3715
				Cst_c25670	1	48.6	10.5802
				Cst_c25700	1	87.6	16.6033
				Cst_c25710	1	86.9	14.5541
				Cst_c25720	1	22.1	10.9366
				Cst_c25730	1	58.9	11.1422
				Cst_c25740	1	87.9	17.1912
				Cst_c25760	1	60.7	9.28551
				Cst_c25770	1	37.3	6.13185
				Cst_c25780	1	33.4	6.30991
				Cst_c25790	1	31.4	9.43976
				Cst_c25800	1	75.1	15.0641
				Cst_c25810	1	35.2	6.99604
				Cst_c25820	1	41.2	10.935
				Cst_c25830	1	27.7	5.69747
				Cst_c25840	1	6.2	4.21349
				Cst_c25850	1	9.7	3.55629
				Cst_c25870	1	14.7	6.42567
				Cst_c25880	1	60.3	11.0799
				Cst_c25900	1	38.9	8.71413
				Cst_c25920	1	36.6	7.70101
				Cst_c25930	1	77.7	13.6557
				Cst_c25970	1	49.9	9.88499
				Cst_c25990	1	38.4	9.58028
				Cst_c26000	1	76.3	14.5185
				Cst_c26010	1	43.2	11.285
				Cst_c26020	1	13.6	5.36344
				Cst_c26030	1	32.1	8.00719
				Cst_c26050	1	31.4	7.35717
				Cst_c26060	1	29.2	9.09677
				Cst_c26070	1	37.9	10.4674
				Cst_c26090	1	47.6	9.66675
				Cst_c26100	1	62.6	10.2332
				Cst_c26110	1	18.4	7.01587
				Cst_c26120	1	37.1	10.1813
				Cst_c26130	1	63.7	10.7443
				Cst_c26140	1	69.3	14.1359
				Cst_c26150	1	97.8	14.4644
				Cst_c26160	1	77.9	14.874
				Cst_c26170	1	52.7	15.4073
				Cst_c26180	1	73.8	15.0478
				Cst_c26200	1	48.6	14.9418
				Cst_c26210	1	84.7	13.0857
				Cst_c26220	1	37.5	10.567
				Cst_c26230	1	62.2	12.4426
				Cst_c26240	1	71.2	12.6825
				Cst_c26250	1	26.7	12.7072
				Cst_c26260	1	61.4	15.003
				Cst_c26270	1	61	13.7087
				Cst_c26280	1	82.5	15.8218
				Cst_c26290	1	66.4	14.4148
				Cst_c26300	1	81.1	15.0574
				Cst_c26310 Cst_c02670	2	95.5	15.5334
				Cst_c26320	1	44.3	14.9265
				Cst_c26330	1	83.8	15.5801
				Cst_c26340	1	54.9	15.0651
				Cst_c26350	1	64.8	13.6827
				Cst_c26360	1	63.5	15.6413
				Cst_c26370	1	63.6	15.6327
				Cst_c26380	1	66	15.0317
				Cst_c26390	1	63.6	14.7587
				Cst_c26400	1	68	14.99
				Cst_c26410	1	79.6	16.174
				Cst_c26420	1	76.2	14.7906
				Cst_c26430	1	71.8	15.0218
				Cst_c26440	1	65.9	15.1082
				Cst_c26450	1	78.6	15.3248
				Cst_c26460	1	79.6	15.6919
				Cst_c26480	1	32.4	10.4525
				Cst_c26490	1	23.6	9.00923
				Cst_c26500	1	49.2	11.2073
				Cst_c26520	1	85.8	16.0407
				Cst_c26530	1	27.4	12.6988
				Cst_c26540	1	25.9	11.2814
				Cst_c26550	1	16.3	5.67554
				Cst_c26560	1	9.9	6.05544
				Cst_c26570	1	48.5	8.5894
				Cst_c26580	1	29	7.63584
				Cst_c26590	1	86.4	13.2608
				Cst_c26600	1	47.7	8.70716
				Cst_c26610	1	64.6	11.4804
				Cst_c26620	1	53.8	9.56034
				Cst_c26630	1	96.5	16.1707
				Cst_c26640	1	72.2	13.7911
				Cst_c26650	1	76.3	16.0516
				Cst_c26660	1	66.4	15.8077
				Cst_c26670	1	13.6	10.8208
				Cst_c26680	1	6.2	3.40097
				Cst_c26690	1	12.9	7.05822
				Cst_c26700	1	87.4	15.8321
				Cst_c26710	1	85.6	14.9656
				Cst_c26720	1	39.5	10.6299
				Cst_c26730	1	48.5	10.5448
				Cst_c26740	1	25	7.69029
				Cst_c26750	1	36.6	8.75479
				Cst_c26760	1	23.2	4.68701
				Cst_c26770	1	22.2	5.90874
				Cst_c26780	1	13.2	5.58319
				Cst_c26790	1	27	9.1624
				Cst_c26800	1	59.7	13.0316
				Cst_c26810	1	62.3	10.7062
				Cst_c26820	1	28.5	8.25751
				Cst_c26830	1	79.7	12.4441
				Cst_c26840	1	32.7	9.32508
				Cst_c26850	1	27.4	6.66147
				Cst_c26860	1	42.6	10.4868
				Cst_c26870	1	61.4	10.6696
				Cst_c26880	1	49.8	9.42231
				Cst_c26900	1	42.9	10.4555
				Cst_c26910	1	86.5	15.3651
				Cst_c26920	1	40.6	8.16004
				Cst_c26930	1	39.2	7.83913
				Cst_c26970	1	85.6	12.729
				Cst_c26980	1	62.8	11.6115
				Cst_c26990	1	62	13.2819
				Cst_c27000	1	87.2	11.5839
				Cst_c27010	1	42.6	8.64252
				Cst_c27020	1	29.5	7.58663
				Cst_c27030	1	75.8	14.5119
				Cst_c27040	1	30.6	8.69366
				Cst_c27050	1	45.4	14.5016
				Cst_c27060	1	48.4	9.85681
				Cst_c27070	1	3.4	4.88019
				Cst_c27090	1	62.1	12.7017
				Cst_c27110	1	23.7	8.35932
				Cst_c27140	1	30.9	9.28915
				Cst_c27160	1	60.9	11.3844
				Cst_c27170	1	27.4	8.16795
				Cst_c27190	1	89.1	16.4596
				Cst_c27200	1	44.7	10.2934
				Cst_c27240	1	59.2	9.32365
				Cst_c27250	1	80	12.8949
				Cst_c27260	1	80.4	14.3576
				Cst_c27320	1	57.9	10.7219
				Cst_c27350	1	58.6	11.3896
				Cst_c27360	1	30.4	10.1872
				Cst_c27370	1	58.2	12.9487
				Cst_c27380	1	15.3	6.84847
				Cst_c27390	1	32	8.02538
				Cst_c27450	1	13	4.51929
				Cst_c27490	1	15.1	5.31345
				Cst_c27510	1	11	5.85358
				Cst_c27520	1	45.9	10.4401
				Cst_c27530	1	10.8	4.07418
				Cst_c27540	1	41	9.49594
				Cst_c27550	1	29.9	8.02832
				Cst_c27570	1	4.9	5.5933
				Cst_c27580	1	58.9	9.159
				Cst_c27590	1	23.8	6.81826
				Cst_c27600	1	13.3	6.66223
				Cst_c27620	1	33.8	7.99097
				Cst_c27630	1	59.3	12.7351
				Cst_c27640	1	46.5	11.9169
				Cst_c27650	1	76.4	12.9982
				Cst_c27660	1	27.3	13.1159
				Cst_c27670	1	65.3	12.0475
				Cst_c27730	1	61.8	11.9828
				Cst_c27750	1	52.9	11.8195
				Cst_c27760	1	70.8	9.80485
				Cst_c27770	1	44.4	10.1469
				Cst_c27780	1	49.5	10.0351
				Cst_c27790	1	55.7	13.6371
				Cst_c27800	1	29	10.7241
				Cst_c27820	1	38.3	7.86488
